# Supplementary material for: COVID-19 vaccine effectiveness among healthcare workers in Albania (COVE-AL): protocol for a prospective cohort study and cohort baseline data
Source: PubMed Central journal article supplement — BMJ Open. 2022 Mar 23;12(3):e057741. doi: 10.1136/bmjopen-2021-057741 (PMC8943479; doi:10.1136/bmjopen-2021-057741), 2022-03-23
Supplement: bmjopen-2021-057741.draft_revisions.pdf [file bmjopen-2021-057741.draft_revisions.pdf]

# BMJ Open

BMJ Open is committed to open peer review. As part of this commitment we make the peer review history of every article we publish publicly available.

When an article is published we post the peer reviewers' comments and the authors' responses online. We also post the versions of the paper that were used during peer review. These are the versions that the peer review comments apply to.

The versions of the paper that follow are the versions that were submitted during the peer review process. They are not the versions of record or the final published versions. They should not be cited or distributed as the published version of this manuscript.

BMJ Open is an open access journal and the full, final, typeset and author-corrected version of record of the manuscript is available on our site with no access controls, subscription charges or pay-per-view fees (<http://bmjopen.bmj.com>).

If you have any questions on BMJ Open's open peer review process please email [info.bmjopen@bmj.com](mailto:info.bmjopen@bmj.com)

# BMJ Open

## Cohort Study to Measure COVID-19 Vaccine Effectiveness among Health Workers in Albania (COVE-AL): Study Protocol and Description of Participants at Enrollment

|                               |                                                                                                                                                                                                                                                                                                                                                                                                                                                                                                                                                                                                                                                                                                                                                                                                                                                                                                                                                                                                                                            |
|-------------------------------|--------------------------------------------------------------------------------------------------------------------------------------------------------------------------------------------------------------------------------------------------------------------------------------------------------------------------------------------------------------------------------------------------------------------------------------------------------------------------------------------------------------------------------------------------------------------------------------------------------------------------------------------------------------------------------------------------------------------------------------------------------------------------------------------------------------------------------------------------------------------------------------------------------------------------------------------------------------------------------------------------------------------------------------------|
| Journal:                      | <i>BMJ Open</i>                                                                                                                                                                                                                                                                                                                                                                                                                                                                                                                                                                                                                                                                                                                                                                                                                                                                                                                                                                                                                            |
| Manuscript ID                 | bmjopen-2021-057741                                                                                                                                                                                                                                                                                                                                                                                                                                                                                                                                                                                                                                                                                                                                                                                                                                                                                                                                                                                                                        |
| Article Type:                 | Protocol                                                                                                                                                                                                                                                                                                                                                                                                                                                                                                                                                                                                                                                                                                                                                                                                                                                                                                                                                                                                                                   |
| Date Submitted by the Author: | 28-Sep-2021                                                                                                                                                                                                                                                                                                                                                                                                                                                                                                                                                                                                                                                                                                                                                                                                                                                                                                                                                                                                                                |
| Complete List of Authors:     | Sridhar, Shela; Boston Children's Hospital, Global Health Program Fico, Albana; Institute of Public Health<br>Preza, Iria; Institute of Public Health<br>Hatibi, Iris; Institute of Public Health<br>Sulo, Jonilda; Southeast European Center for Surveillance and Control of Infectious Disease<br>Kissling, Esther<br>Daja, Rovena; Institute of Public Health<br>Ibrahim, Rawi; WHO Regional Office for Europe<br>Lemos, Diogo; WHO Regional Office for Europe<br>Rubin-Smith, Julia; Boston Children's Hospital<br>Schmid, Alexis; Boston Children's Hospital<br>Vasili, Adela; Institute of Public Health<br>Valenciano, M; EpiConcept<br>Jorgensen, Pernille; World Health Organization, Regional Office for Europe;<br>Pebody, Richard; World Health Organization Regional Office for Europe<br>Lafond, Kathryn; CDC Atlanta<br>Katz, Mark ; World Health Organization Regional Office for Europe<br>Bino, Silvia; Institute of Public Health, Southern European Centre for Surveillance and Control of Infectious Diseases (SECID) |
| Keywords:                     | COVID-19, Infection control < INFECTIOUS DISEASES, Public health < INFECTIOUS DISEASES, Health & safety < HEALTH SERVICES ADMINISTRATION & MANAGEMENT                                                                                                                                                                                                                                                                                                                                                                                                                                                                                                                                                                                                                                                                                                                                                                                                                                                                                      |
|                               |                                                                                                                                                                                                                                                                                                                                                                                                                                                                                                                                                                                                                                                                                                                                                                                                                                                                                                                                                                                                                                            |

SCHOLARONE™  
Manuscripts

**Title:** Cohort Study to Measure COVID-19 Vaccine Effectiveness among Health Workers in Albania (COVE-AL): Study Protocol and Description of Participants at Enrollment

**Current Manuscript Word Count** (not including title, references, tables/figures): 3834

**Abstract word count:** 300

**Authors:** Shela Sridhar, MD, MPH<sup>1,2</sup>, Albana Fico, MD, PhD<sup>3</sup>, Iria Preza, MPH<sup>3</sup>, Iris Hatibi, MPH, PhD<sup>3</sup>, Jonilda Sulo, MPH<sup>4</sup>, Esther Kissling, MSc<sup>5</sup>, Rovena Daja MD, MPH<sup>3</sup>, Rawi Ibrahim, MPH<sup>6</sup>, Diogo Lemos, Mr<sup>6</sup>, Julia Rubin-Smith, MD, MSPH, CTropMed<sup>1</sup>, Alexis Schmid, MS, DNP, DTN<sup>1</sup>, Adela Vasili, MD<sup>3</sup>, Marta Valenciano, PhD<sup>5</sup>, Pernille Jorgensen, MSc, MPH<sup>6</sup>, Richard Pebody, MBChB<sup>6</sup>, Kathryn Lafond, MPH<sup>7</sup>, Mark A. Katz, MD<sup>6</sup>, Silvia Bino MD, PhD<sup>3</sup>

<sup>1</sup>Boston Children's Hospital Global Health Program, Boston, MA, USA

<sup>2</sup>Brigham and Women's Hospital, Department of Global Health Equity, Boston, MA, USA

<sup>3</sup>Institute of Public Health, Tirana, Albania

<sup>4</sup>Southeast European Center for Surveillance and Control of Infectious Disease, Tirana, Albania

<sup>5</sup>Epiconcept, Paris, France

<sup>6</sup>WHO Regional Office for Europe, Copenhagen, Denmark

<sup>7</sup>US CDC, Atlanta Georgia

\*Corresponding author: shela.sridhar@childrens.harvard.edu

## **Abstract**

### *Introduction:*

Critical questions remain about COVID-19 vaccine effectiveness (VE) in real-world settings, particularly in middle-income countries. We describe a study protocol to evaluate COVID-19 VE in preventing laboratory-confirmed SARS-CoV-2 infection in health workers (HWs) in Albania, an upper-middle-income country.

### *Methods and Analysis:*

In this 12-month prospective cohort study, we enrolled HWs at 3 hospitals in Albania. HWs were vaccinated through the routine COVID-19 vaccine campaign. Participants completed a baseline survey about

1  
2  
3 demographics, clinical comorbidities, and infection risk behaviors. Serology samples were collected and  
4 tested against the SARS-CoV-2 spike protein, and respiratory swabs were collected and tested for SARS-  
5 CoV-2 by RT-PCR. Participants are complete weekly symptom questionnaires. Symptomatic participants  
6 have a respiratory swab collected, and tested for SARS-CoV-2. At 3, 6, 9 months and 12 months of the  
7 study, serology will be collected and tested for antibodies against the SARS-CoV-2 nucleocapsid protein  
8 and spike protein. VE will be estimated using a piece-wise proportional hazards model ( $VE = 1 - \text{hazard}$   
9 ratio [HR]).  
10  
11  
12  
13  
14  
15  
16  
17  
18  
19

### 20 *Results:*

21  
22 From February, 2021- May, 2021, 1504 HWs were enrolled. The median age was 44 (range: 22-71) and  
23 78% were female. At enrollment, 72% of participants were seropositive for SARS-CoV-2. 56% of  
24 participants were vaccinated with one dose, of whom 98% received their first shot within 4 days of  
25 enrollment. All HWs received the Pfizer BNT162b2 mRNA COVID-19 vaccine.  
26  
27  
28  
29  
30  
31

### 32 *Discussion:*

33  
34 Our prospective VE study among HWs will provide critical data about real-world COVID-19 VE, including  
35 duration of vaccine and naturally derived protection.  
36  
37  
38  
39  
40

### 41 *Ethics and dissemination:*

42  
43 The study protocol and procedures were reviewed and approved by the WHO and Albanian Institute of  
44 Public Health (IPH) Ethical Review Boards. Funding is provided by the WHO Regional office For Europe  
45 and the United States Centers for Disease Control and Prevention (US CDC).  
46  
47  
48  
49  
50

### 51 *Registration:*

52  
53 This study has been registered with [clinicaltrials.gov](https://clinicaltrials.gov) (Identifier NCT04811391).  
54  
55  
56  
57  
58  
59  
60

### Strengths and Limitations of this Study

- This study is a rigorous, prospective vaccine effectiveness study using standardized methodology in an upper middle-income country.
- A very sensitive definition, and PCR and serology testing at regular intervals will allow us to identify asymptomatic and symptomatic infections.
- As the SARS-CoV-2 pandemic continues to evolve, resulting in multiple variants, we will be able to quantify re-infection in previously individuals.
- Our study is composed of health workers, who may have different rates of exposure to COVID-19 and different sociodemographic characteristics compared to the general population, which may limit the generalizability of the study to the broader population of Albania.
- Preliminary results indicate high levels of previous infection, and which may limit our ability to evaluate VE in a previously uninfected population.

### **Introduction:**

COVID-19 vaccination is critical to reducing the impact of the COVID-19 pandemic. While randomized controlled trials (RCTs) of COVID-19 vaccines have reported high efficacy in preventing SARS-CoV-2 infection,<sup>1</sup> there are a number of reasons why COVID-19 vaccine effectiveness (VE) in real-world settings may be different. In real-world settings, factors such as vaccine storage, transport capacity, and vaccine administration may vary widely.<sup>2,3</sup> In addition, questions about duration of protection, VE against emerging variants of concern, VE against reinfection and VE among individuals with comorbidities and populations with increased exposure risk, like health workers, are best answered through studies conducted in real world conditions. To date, a number of early real-world observational studies have demonstrated moderate to high VE in high-income countries against a range of end-points,<sup>4,5</sup> but limited studies to date<sup>6</sup> have been published on real-world VE in low- and middle-income countries (LMICs).

1  
2  
3  
4  
5 Albania is an upper middle-income country in Eastern Europe with a population of 2.9 million people.<sup>7</sup> As  
6 of June 1, 2021, Albania had reported over 132,000 laboratory-confirmed cases of COVID-19 and over  
7 2,000 COVID-19-related deaths,<sup>8</sup> out of a population of 2.8 million.<sup>9</sup> In December 2020, in accordance  
8 with the WHO Strategic Advisory Group of Experts on Immunization (SAGE) and the European Technical  
9 Advisory Group, the Albanian National Immunization Technical Advisory Group prioritized health  
10 workers (HWs) in Albania as the first target group for COVID-19 vaccine.<sup>10</sup> In December of 2020, about  
11 500,000 doses of the Pfizer BNT162b2 mRNA COVID-19 vaccine were donated by an undisclosed country  
12 with the first 11,000 doses arriving in January 2021.<sup>11</sup> On January 12, 2021, the first doses of COVID-19  
13 vaccine were administered to healthcare workers in Albania.<sup>11,12</sup>

14  
15  
16  
17  
18  
19  
20  
21  
22  
23  
24  
25  
26 HWs offer an early opportunity to evaluate COVID-19 VE in a population in which it is critical that an  
27 effective vaccine be deployed. HWs are at high risk of acquiring SARS-CoV-2 infection, and have  
28 experienced high rates of morbidity during the COVID-19 pandemic.<sup>14</sup> HWs also pose a risk of onward  
29 transmission to hospitalized patients, who are often at high risk of serious COVID-19 outcomes.<sup>15</sup>

30  
31  
32  
33  
34  
35  
36  
37 We describe the protocol and the profile of participants of a study of COVID-19 VE among HWs in  
38 Albania, based on a guidance document for VE studies in HWs developed by the WHO Regional Office  
39 for Europe.<sup>13</sup> We also describe the characteristics of study participants at enrollment.

## 40 41 42 43 44 45 **Methods and analysis**

### 46 47 **Objectives**

48  
49 The study is a 12-month prospective longitudinal cohort study, which started in February 2021 and will  
50 continue through March 2022, to evaluate COVID-19 VE in preventing SARS-CoV-2 infection in HWs in  
51 three hospitals in Albania. The primary objective is to measure COVID-19 VE against any laboratory-  
52 confirmed SARS-CoV-2 infection among hospital-based health workers. The secondary objectives include  
53  
54  
55  
56  
57  
58  
59  
60

1  
2  
3 measuring VE against the following outcomes: symptomatic and asymptomatic laboratory-confirmed  
4 SARS-CoV-2 infection; reinfection; and infection with new SARS-CoV-2 variants; and estimating VE by  
5 age, by various comorbidities, by degree of exposure to COVID-19 patients in the hospital, by physical  
6 distancing practices outside of the hospital, and by length of time since vaccination.  
7  
8  
9  
10

11  
12  
13 The primary and secondary objectives of the study and the knowledge gaps they address are outlined in  
14 Table 1.  
15

### 16 17 18 19 20 **Study site and participant selection**

21  
22 This study is being conducted among HWs working in the following three hospitals in Albania: Tirana  
23 University Hospital “Mother Theresa” (3200 HWs); Durres Regional hospital (700 HWs); and Fier  
24 Regional Hospital (527 HWs). The three hospitals were chosen for the study because they are large, each  
25 employing a large number of health workers, and centrally located, facilitating sample transport to the  
26 national Institute of Public Health (IPH) laboratories, located in the capital, Tirana.  
27  
28  
29  
30  
31

32  
33  
34 All HWs at least 18 years old in the three hospitals who do not have contraindications to receive COVID-  
35 19 vaccine, specifically previous allergic reactions to components of the vaccine were invited to enroll in  
36 the study. HWs include any individual working within the hospital system, including physicians, nurses,  
37 respiratory therapists, lab technicians, janitorial staff, food workers and administrative staff, regardless of  
38 the extent of direct patient interaction. Preference for recruitment was given to those HWs who received  
39 their first dose of the Pfizer BNT162b2 mRNA COVID-19 vaccine no more than 4 days prior to the day of  
40 enrollment. Participation is voluntary and does not affect HW’s access to receive the COVID-19 vaccine at  
41 any time during the study. Vaccinations were provided by the hospitals as part of the Albanian vaccine  
42 rollout and were not impacted by the study.  
43  
44  
45  
46  
47  
48  
49  
50  
51  
52

### 53 54 55 56 **Patient and Public Involvement:**

1  
2  
3 There was no patient involvement in the design of the study.  
4  
5  
6

### 7 **Recruitment and Enrollment**

8  
9 Each participant will be followed for 12 months. After approval, the study was publicized within  
10 participating hospitals by word of mouth, flyers, and social media. Study staff approached HWs at various  
11 highly trafficked points in the hospital, but ensured not to interfere with any routine hospital work.  
12  
13  
14

15  
16  
17  
18 Study staff described the study in detail, answered all questions, and reviewed the informed consent form  
19 with the potential participant in a private area designated for study use. Participation in the study is  
20 confidential and anonymous from the hospital records, and study participation is not a condition of  
21 employment. HWs were invited to participate in the study regardless of their intention to be vaccinated or  
22 of their vaccination status. Health workers who later choose to get vaccinated will remain in the study; their  
23 new vaccination status will be documented and taken into account in the analysis.  
24  
25  
26  
27  
28  
29  
30

### 31 **Study Design**

32  
33  
34 After informed consents were obtained, participants, were requested to complete an enrollment  
35 questionnaire that included demographic, clinical, and epidemiological information, information about  
36 vaccination history, occupation- and community-related behavior, and recent symptoms. The date of the  
37 first Covid vaccine shot for those who chose to be vaccinated was collected as well (see Appendix 1); to  
38 provide a blood sample for baseline serological evaluation to assess for previous SARS-CoV-2 infection;  
39 and to provide a respiratory sample for COVID-19 RT-PCR testing to evaluate for asymptomatic SARS-  
40 CoV-2 infection at the time of enrollment.  
41  
42  
43  
44  
45  
46  
47  
48  
49  
50

51 For study participants who do not receive their first COVID-19 vaccine at enrollment but receive their first  
52 COVID-19 vaccine 14 days or more after enrollment, an additional blood sample is collected, along with a  
53 respiratory sample that will be tested for SARS-CoV-2 by RT-PCR to assess for asymptomatic infection  
54  
55  
56  
57  
58  
59  
60



1  
2  
3 which may have occurred between enrollment and the time of vaccination. As part of the weekly  
4 questionnaire, we ask participants if they received their first or second covid-19 vaccine in the previous  
5 week. In addition, a brief questionnaire about recent symptoms is administered. Timing of questionnaires  
6 is outlined in Table 2.  
7  
8  
9

#### 10 11 12 13 14 *Surveillance:*

15  
16 Following enrollment, for the duration of the study, every week participants will be asked to complete a  
17 short questionnaire by phone, email, paper or online about whether or not they had symptoms consistent  
18 with COVID-19 and whether they have received a COVID-19 vaccine in the past week (see symptom  
19 questionnaire) (Appendix 2).  
20  
21  
22  
23

24  
25  
26 Oral, nasal or nasopharyngeal PCR specimens will be collected from any participant who reports having  
27 any of the symptoms, listed in Table 3 based on the Institute of Public Health, Albania case definition for  
28 suspected COVID-19 during the weekly questionnaire.<sup>16</sup>  
29  
30  
31  
32

33  
34  
35 In order to identify test results from SARS-CoV-2 tests performed in locations outside of the study, such  
36 as private clinics, study staff will cross-reference participants' study ID numbers with the Albanian national  
37 SARS-CoV-2 testing database within the web-based Information System for Infectious Disease (ISID),  
38 which contains results for all COVID-19 tests performed in the country. For participants who are found to  
39 have a SARS-CoV-2 test result outside of the study, an additional symptom questionnaire will be  
40 administered (Appendix 3).  
41  
42  
43  
44  
45  
46  
47  
48  
49

50 Study staff will inform HWs about their PCR test results as soon as laboratory testing is complete, whether  
51 positive or negative. Staff will also provide basic information to COVID-19-positive participants regarding  
52  
53  
54  
55  
56  
57  
58  
59  
60

1  
2  
3 the importance of informing known contacts, when to seek additional medical care, quarantining measures  
4 and follow-up with a physician.  
5  
6  
7

8  
9 In addition, all SARS-CoV-2-positive cases will be reported automatically by the IPH laboratory to the  
10 relevant hospital infection control team and to the relevant local public health unit via the web-based  
11 information system for infectious diseases, as is standard procedure in Albania.  
12  
13  
14  
15

16  
17 Study staff will also contact participants who test positive for SARS-CoV-2 30 days after their positive  
18 result in order to administer a brief follow-up questionnaire about their clinical course (Appendix 4).  
19  
20 Participants who test positive for SARS-CoV-2 will not need to fill out the weekly questionnaire for 90  
21 days following their positive test result. In addition to serology at enrollment, blood samples for serology  
22 will be collected at 3, 6, 9 months, and 12 months, in order to identify asymptomatic cases during the study  
23 period.  
24  
25  
26  
27  
28  
29  
30

### 31 32 **Study Staff**

33  
34 The study team includes staff of the Albanian Institute of Public Health (IPH) with experience conducting  
35 research, and staff at each of the hospitals. The Albanian IPH provides programmatic and technical support  
36 for operations and data management.  
37  
38  
39  
40  
41  
42

43 Study staff will follow infection control guidelines for every interaction with study participants, study team  
44 members and laboratory staff. Staff involvement in the study is not related to whether or not they choose  
45 to get vaccinated themselves and will not have an impact on their access to receiving vaccine.  
46  
47  
48  
49  
50

### 51 52 **Sample Size Calculations**

1  
2  
3 Sample size was calculated to allow for robust estimates for the primary study objective, based on estimated  
4 vaccination coverage among health workers in Albania, estimated VE, the estimated incidence of SARS-  
5 CoV-2 infection over the follow-up time in the unvaccinated study population, and the desired precision.  
6  
7  
8  
9

10  
11 To meet the desired precision of 5% significance level and a power of 80%, and using the assumptions of  
12 a VE of 70% with an incidence of SARS-CoV-2 of 0.05 over the 12-month period and vaccine coverage  
13 among participants of 80%, and accounting for a drop-out rate of roughly 10%<sup>13</sup>, we estimated a target  
14 population of 1500 HWs.  
15  
16  
17  
18  
19

### 20 21 22 **Data management and Ensuring Data Confidentiality**

23  
24 Data collection and site-level management are conducted using REDCap (Research Electronic Data  
25 Capture, Vanderbilt University, Nashville, TN, USA), a secure web application for building and managing  
26 online surveys and databases.<sup>17</sup> Within REDCap, a specific project containing all data collection  
27 instruments including participant consent forms, enrollment questionnaires, specimen collection, laboratory  
28 results, weekly questionnaires and follow up of symptomatic and COVID-19 positive cases will be  
29 customized for this study and organized to cover a period of 52 weeks for each participant. Any paper  
30 documentation will be stored in a secured space and data is uploaded through a secure web connection.  
31  
32  
33  
34  
35  
36  
37  
38  
39  
40

41 Identifying information will be maintained only by the responsible person(s) in each study site in  
42 accordance with Ministry of Health and Social Protection requirements. Security measures including  
43 password protection and encrypted files will be implemented for all study data.  
44  
45  
46  
47  
48

### 49 **Laboratory Procedures:**

#### 50 *Sample Collection*

51  
52 All biological sampling for SARS-CoV-2 RNA will be conducted following IPH guidelines on the proper  
53 handling and processing of potentially infectious biological materials, based on the latest recommendations  
54  
55  
56  
57  
58  
59  
60

1  
2  
3 from WHO<sup>18</sup>. Dedicated medical staff will collect nasal from participants at enrollment and from  
4 symptomatic participants during the course of the study. Specimens will be transported to the laboratory as  
5 soon as possible after collection. If a respiratory specimen is not likely to reach the laboratory and be tested  
6 within 96 hours, it will be stored, at  $-70^{\circ}\text{C}$ , and shipped on ice thermo-boxes. Venipuncture for sera will  
7 be collected by hospital-based phlebotomists. Serum specimens will be separated from whole blood and  
8 stored and shipped at  $4^{\circ}\text{C}$  or sera spun and frozen to  $-20^{\circ}\text{C}$  and shipped directly to the national reference  
9 lab at IPH, where they should be stored at  $-20^{\circ}\text{C}$  or lower until tested.  
10  
11  
12  
13  
14  
15  
16  
17  
18  
19

### 20 *Testing*

21 All respiratory samples will be tested for SARS-CoV-2 by RT-PCR. The Real-Time PCR testing for SARS-  
22 CoV-2 will be conducted in the IPH laboratory in Tirana based on methods implemented and validated in  
23 the IPH lab targeting the three major gene targets (N, S and ORF1ab). Testing will be conducted with  
24 TaqPath COVID-19 CE-IVD kits developed by Thermo Fischer.<sup>19</sup> RT-PCR- positive specimens collected  
25 from participants will be further characterized by genetic sequencing at a regional reference laboratory in  
26 Europe, following WHO guidelines,<sup>20</sup> in order to understand whether changes in VE could be due in part  
27 to virus mutations or specific variant viruses.  
28  
29  
30  
31  
32  
33  
34  
35  
36  
37  
38  
39

40 Enrollment serology samples were tested using the Wantai antibody ELISA for qualitative detection of total  
41 IgG and IgM antibodies to the SARS-Co-V-2 Spike protein.<sup>21</sup> Cut-offs were determined according to  
42 manufacturer instructions.<sup>21</sup> Serology samples from enrollment will also be tested for anti-nucleocapsid  
43 antibodies. Quarterly serological samples will be tested by anti-nucleocapsid protein antibody tests in order  
44 to identify natural infection among vaccinated and unvaccinated participants, and by quantitative anti-spike  
45 protein antibody tests in order to identify potential correlates of protection. Additional serological studies  
46 may also be performed on a subset of samples.  
47  
48  
49  
50  
51  
52  
53  
54  
55  
56  
57  
58  
59  
60

## Analysis plan and statistical considerations

### *Vaccine effectiveness analysis*

Study participants will be described in terms of total number of eligible HWs, and number and proportion of total who refused participation. Vaccination status will be considered a time-varying exposure (vaccination status of individuals may change over time from unvaccinated to vaccinated; one to two doses).

An individual will be considered vaccinated with the first dose 14 days after receiving the first vaccine and fully vaccinated 14 days after receiving the second dose of the vaccine. Sensitivity analyses may be performed to evaluate the effectiveness of the vaccine after different intervals following vaccination.

Hazard ratios comparing vaccinated and unvaccinated will be estimated using piece-wise exponential survival models. Poisson regression will be used to model these,<sup>22</sup> with the log of person time in the offset, and time split into intervals allowing to estimate baseline hazards of SARS-CoV-2. Individual-level variability will be explored by adding a subject-specific random effect.

VE will be estimated as  $(1 - \text{hazard ratio [HR]})$ . Follow-up will be from enrollment to the earliest of outcome or study exit. Primary VE analysis will be for the hazard ratio for events in the period 14 days from first dose of vaccine onwards, and from the period of 14 days from second dose of vaccine onwards, both compared to events among unvaccinated. Analyses will be carried out in the overall cohort and separately among participants with and without previous infection, if sample size allows.

Both unadjusted and adjusted estimates of VE will be presented. We will adjust the multivariable regression model using a priori fixed covariates (hospital, cohort, age, sex and comorbidities) and potential confounders, such as occupation, patient-facing role, performance of aerosol-generating procedures and use of public transport. Bivariable and stratified analyses using participant characteristics will be carried out to better understand potential confounders and effect modifiers. Effect modifiers will be assessed using interaction terms. Factors other than statistical significance (magnitude of measure of effect, biological

1  
2  
3 plausibility) will be used to assess interactions for relevance. Confounding factors will be assessed by  
4 comparing crude and adjusted estimates for each baseline characteristic. We will perform a backward  
5 selection procedure to identify other potential confounders. The multivariable regression model will include  
6 those variables that change the VE estimates by 5% absolute.  
7  
8  
9  
10

11  
12  
13 If sample size permits, additional secondary estimates for VE will be calculated by the following  
14 parameters:  
15

- 16 ● partially vs. fully vaccinated;
  - 17 ● type of HW and wards;
  - 18 ● age groups;
  - 19 ● sex;
  - 20 ● presence or absence of high-risk conditions for severe illness (see appendix 1)<sup>13</sup>;
  - 21 ● study week or weeks of the year;
  - 22 ● time since vaccination
  - 23 ● variants of concern
- 24  
25  
26  
27  
28  
29  
30  
31  
32  
33  
34  
35  
36

### 37 **Profile of study population:**

38  
39 The study began recruitment on Feb 19, 2021, and as of May 1, 2021, 1504 HWs had been enrolled,  
40 including 942 (63%) from Tirana University Hospital, 300 (20%) from Durres Hospital and 262 (17%)  
41 from Fier Hospital. Demographic information and the results of enrollment serology and PCR testing are  
42 described in Table 4. Overall, the median age was 44 years (range: 22, 71), 1181 (78%) of participants were  
43 female, and 385 (26%) reported having at least one co-morbidity. In all, 1434 of 1504 (95%) reported  
44 having direct patient contact. 536 (36%) reported having tested positive for COVID-19 prior to enrollment  
45 (418 (77%) by PCR, 54 (10%) by serology, 47 (9%) by rapid test and 46 (7%) were unsure of the testing  
46 method). At enrollment, 18 (1%) of participants were positive for SARS-CoV-2 by RT-PCR and 1085  
47 (72%) of participants were positive for SARS-CoV-2 anti-spike protein antibodies based on serology  
48  
49  
50  
51  
52  
53  
54  
55  
56  
57  
58  
59  
60

1  
2  
3 testing. Of the participants who tested positive by RT-PCR, 7 out of 18 reported at least 1 symptom. Overall,  
4  
5 842 (56%) of study participants had received one dose of the Pfizer BNT162b2 mRNA COVID-19 vaccine  
6  
7 vaccine at enrollment. All vaccinated participants received their first vaccine dose no more than 4 days  
8  
9 prior to enrollment. No participants had received two doses of vaccine prior to enrollment, and no  
10  
11 participants received a vaccine other than the Pfizer BNT162b2 mRNA COVID-19 vaccine prior to  
12  
13 enrollment.  
14  
15

## 16 17 18 **Discussion**

19  
20 In our prospective study of COVID-19 VE in HWs in Albania, we aim to answer critical questions about  
21  
22 the real-world effectiveness of COVID-19 vaccines among HWs in an upper middle-income country. While  
23  
24 preliminary reports of real world VE for mRNA vaccines have shown encouragingly high VE of 86-90%  
25  
26 against SARS CoV-2 infection, these studies were conducted in high-income countries, such as UK, the  
27  
28 US and Israel.<sup>4,5,23</sup> Effectiveness may vary in lower-resource settings, in part due to challenges such as  
29  
30 vaccine transport, storage, administration and associated technical skill.<sup>3</sup> Low- and middle-income  
31  
32 countries could also face varying levels of virus transmission, in part due to lower vaccine coverage, and  
33  
34 different circulating viruses. As of June 1, over 460,000 people (17% of the population) in Albania had  
35  
36 received at least one dose of COVID-19 vaccine,<sup>24</sup> much lower than the one-dose coverage rates in the  
37  
38 United Kingdom (58%), the United States of America (50%) and Israel (63%) by the same date.<sup>4</sup>  
39  
40 Understanding VE in a middle-income country such as Albania provides important information regarding  
41  
42 allocation and effective vaccine distribution in similar contexts. This understanding has a critical impact on  
43  
44 local funding of vaccines as well as building trust in local vaccine rollouts.<sup>25</sup>  
45  
46  
47  
48  
49

50  
51 Our protocol was adapted from the WHO/Europe guidance document for cohort studies to measure  
52  
53 COVID-19 VE in HWs<sup>13</sup>. Similar studies based on the same guidance document are being conducted in  
54  
55 other countries within the Eastern European region, and will provide an opportunity to compare country-  
56  
57  
58  
59

1  
2  
3 level VE and to estimate VE using aggregated data. Similar studies evaluating VE in HWs have been  
4 conducted in the US by the HEROES/RECOVER network as well.<sup>26</sup>  
5  
6  
7

8  
9 The enrollment profile of participants in our study offers unique challenges and opportunities. Over 70%  
10 of our study participants were seropositive for SARS-CoV-2 anti-spike antibodies on enrollment, a figure  
11 that is higher than the 48% seropositivity reported from a seroprevalence survey of the general population  
12 of Tirana, Albania during December 2020.<sup>27</sup> which was nearly 2 months prior to the start of our study.  
13  
14 Nearly all (98%) of vaccinated participants had serology drawn within 4 days of their first vaccination,  
15 making it very unlikely that seropositivity reflects a vaccine-induced antibody response. While false  
16 positives are a consideration from the WANTAI SARS-CoV-2 Ab Elisa due to cross-reactivity from pre-  
17 existing antibodies, the test has a been found to have sensitivity of 99%.<sup>28</sup>  
18  
19  
20  
21  
22  
23  
24  
25  
26  
27

28 While previously infected study participants are likely to be at reduced risk for reinfection for at least 5-6  
29 months,<sup>29</sup> the study population represents real-world conditions, and future recommendations about vaccine  
30 use will need to be made taking into account the fact that many populations have high seroprevalence. We will  
31 test quarterly serologies using an anti-nucleocapsid antibody test, which will allow us to measure natural  
32 infection among both vaccinated and unvaccinated participants. Because this is a 12-month study, we hope  
33 to be able to draw conclusions about duration of VE, duration of natural immunity, with or without vaccine,  
34 and VE against Variants of Concern that may appear and could escape existing vaccines and/or natural  
35 immunity, as has recently been demonstrated with the delta variant for partially vaccinated individuals.<sup>30</sup>  
36  
37  
38  
39  
40  
41  
42  
43  
44  
45  
46

47 A strength of our study is the novelty of conducting a rigorous, prospective VE study using standardized  
48 methodology in an upper middle-income country.<sup>13</sup> Another strength is the use of a very sensitive definition  
49 for suspected symptomatic cases of COVID-19, which will ensure that even mildly symptomatic cases will  
50 be captured in our analysis. Additionally, testing serology samples using anti-nucleocapsid antibody testing  
51 will allow us to identify asymptomatic infections or symptomatic infections not captured by PCR screening  
52  
53  
54  
55  
56  
57  
58  
59  
60



1  
2  
3 and distinguish vaccine-induced immune response from infection-induced immunity. By capturing  
4 serology and nasal swabs at enrollment, prior infection will be incorporated into our analysis. In addition,  
5 the use of the Albanian National Database will allow for close monitoring of Covid-19 tests, include those  
6 performed by study participants outside of the study.  
7  
8  
9  
10

11  
12  
13  
14 Our study has a number of limitations. Our study is subject to selection bias; the study was voluntary and  
15 although we tried to recruit HWs broadly in the three hospitals, it is possible that the HWs in our study are  
16 not representative of all HWs in the three hospitals or of the general population in Albania.  
17  
18  
19  
20

21  
22  
23 In addition, our study includes HWs, who are likely to have different rates of exposure to COVID-19 and  
24 different sociodemographic characteristics compared to the general population. As a result, study results  
25 are not be generalizable to the broader population of Albania. Because of the high levels of previous  
26 infection, we may not be adequately powered to show VE in a previously uninfected population. However,  
27 the added value of vaccine in preventing re-infection in previously infected individuals is an important gap  
28 in global evidence; our study may allow us to answer this question. Additionally, the SARS-CoV-2  
29 pandemic continues to evolve, resulting in multiple variants of concern, such as the delta variant, which  
30 have been associated with vaccine breakthrough infections, and meaningfully reduced vaccine effectiveness  
31 for mild and, to a lesser extent severe, illness.<sup>31</sup> It is unclear to what extent natural infection will protect  
32 from future VoCs, even with the addition of partial or full vaccination, but a similar pattern may emerge.  
33  
34 Furthermore, given the potentially low number of cases among previously infected individuals,<sup>29</sup>we may  
35 be inadequately powered to evaluate secondary VE objectives such as VE by age and co-morbidity or by  
36 variant infection.  
37  
38  
39  
40  
41  
42  
43  
44  
45  
46  
47  
48  
49  
50

51  
52 Understanding the VE of the COVID-19 vaccine in HWs in Albania will provide critical information about  
53 the performance of COVID-19 vaccines in an upper middle-income country over the course a 12-month  
54  
55  
56  
57  
58  
59  
60

1  
2  
3 period. Our findings should inform decisions about vaccine use in Albania and could be helpful for other  
4  
5 countries in the region and around the world, which will likely be facing very similar questions about  
6  
7 vaccine policy.  
8  
9

### 10 11 12 **Ethics/Dissemination:** 13

14 The study protocol and procedures were reviewed and approved by the WHO Ethical Review Board as well  
15  
16 as the IPH institutional review board. All data is stored in REDCap and uploaded to the Epifiles database.  
17  
18 Stakeholders have user-specific defined access.  
19  
20

21  
22 The findings and conclusions in this report are those of the authors and do not necessarily represent the  
23  
24 official position of the Centers for Disease Control and Prevention.  
25  
26

27  
28 This study has been registered with clinicaltrials.gov (Identifier NCT04811391). A manuscript with the  
29  
30 results of the primary study will be published in a peer-reviewed journal.  
31  
32  
33

### 34 35 **Disclaimer for use where the author or authors are all WHO staff members**

36 The authors are staff members of the World Health Organization. The authors alone are responsible for  
37  
38 the views expressed in this article and they do not necessarily represent the decisions, policy or views of  
39  
40 the World Health Organization.

### 41 42 **Disclaimer for use where authors from external institutions are involved**

43 The authors alone are responsible for the views expressed in this article and they do not necessarily  
44  
45 represent the views, decisions or policies of the institutions with which they are affiliated.  
46

### 47 48 **Contributorship statement:**

49 All authors made substantial contributions to the conception or design of the work, as well as the  
50  
51 acquisition, analysis and interpretation of data for the work. All authors were involved in drafting and  
52  
53 revising the document for intellectual content and provided final approval of the version to be published.  
54  
55  
56  
57  
58  
59

All authors are in agreement to be accountable for all aspects of this work in regards to accuracy and integrity.

**Competing Interests:** There are no competing interests to report.

**Funding:**

The study is funded by the WHO Regional Office for Europe the United States Centers for Disease Control and prevention (US CDC) and conducted by the Institute of Public Health (IPH) in Albania. There is no associated award/grant number associated.

**References:**

1. Dagan N, Barda N, Kepten E, et al. BNT162b2 mRNA Covid-19 Vaccine in a Nationwide Mass Vaccination Setting. *New England Journal of Medicine*. 2021;384(15). doi:10.1056/NEJMoa2101765
2. Patel MM, Jackson ML, Ferdinands J. Postlicensure Evaluation of COVID-19 Vaccines. *JAMA*. 2020;324(19). doi:10.1001/jama.2020.19328
3. Grenham A, Villafana T. Vaccine development and trials in low and lower-middle income countries: Key issues, advances and future opportunities. *Human Vaccines & Immunotherapeutics*. 2017;13(9). doi:10.1080/21645515.2017.1356495
4. Hall VJ, Foulkes S, Charlett A, et al. SARS-CoV-2 infection rates of antibody-positive compared with antibody-negative health-care workers in England: a large, multicentre, prospective cohort study (SIREN). *The Lancet*. 2021;397(10283). doi:10.1016/S0140-6736(21)00675-9
5. Benenson S, Oster Y, Cohen MJ, Nir-Paz R. BNT162b2 mRNA Covid-19 Vaccine Effectiveness among Health Care Workers. *New England Journal of Medicine*. 2021;384(18). doi:10.1056/NEJMc2101951
6. Jara A, Undurraga EA, González C, et al. Effectiveness of an Inactivated SARS-CoV-2 Vaccine in Chile. *New England Journal of Medicine*. Published online July 7, 2021. doi:10.1056/NEJMoa2107715
7. Institute of Statistics I of PH and I. *Albania Demographic and Health Survey 2017-18*; 2018.
8. <https://graphics.reuters.com/world-coronavirus-tracker-and-maps/countries-and-territories/albania/>. Albania: The Latest Coronavirus Counts, Charts and Maps.
9. France 24. Albania Starts Covid-19 Vaccinations as PM Blasts Slow EU Help. <https://www.france24.com/en/live-news/20210111-albania-starts-covid-19-vaccinations-as-pm-blasts-slow-eu-help>.
10. Semini L. Albania carries out 1st vaccinations with donated doses. *ABC News*. January 11, 2021.
11. Our World in Data. Coronavirus (COVID-19) Vaccinations- Statistics and Research. <https://ourworldindata.org/covid-vaccinations>.
12. World Health Organization. Regional Office for Europe. *Cohort Study to Measure COVID-19 Vaccine Effectiveness among Health Workers in the WHO European Region: Guidance Document*; 2021.
13. Gouda D, Singh PM, Gouda P, Goudra B. An Overview of Health Care Worker Reported Deaths During the COVID-19 Pandemic. *The Journal of the American Board of Family Medicine*. 2021;34(Supplement). doi:10.3122/jabfm.2021.S1.200248
14. SAGE Working Group on COVID-19 vaccines. *WHO SAGE ROADMAP FOR PRIORITIZING USES OF COVID-19 VACCINES IN THE CONTEXT OF LIMITED SUPPLY*.
15. Bino S. *Albanian Case Definition of COVID-19*; 2020.
16. Harris PA, Taylor R, Thielke R, Payne J, Gonzalez N, Conde JG. Research electronic data capture (REDCap)—A metadata-driven methodology and workflow process for providing translational research informatics support. *Journal of Biomedical Informatics*. 2009;42(2). doi:10.1016/j.jbi.2008.08.010

- 1  
2  
3 17. <https://www.who.int/csr/resources/publications/biosafety/Biosafety7.pdf>. *Laboratory Biosafety Manual*. – 3rd Ed.; 2004.
- 4  
5 18. TaqPath COVID-19 Multiplex Diagnostic Solution- US. //www.thermofisher.com/us/en/home/clinical/clinical-genomics/pathogen-detection-solutions/covid-19-sars-cov-2/multiplex.html. .
- 6  
7 19. *Genomic Sequencing of SARS-CoV-2: A Guide to Implementation for Maximum Impact on Public Health.*; 2021.
- 8 20. fda.gov/media/140929/download. Wantai SARS-Co-V-2 Ab Elisa [package insert]. U.S. food and Drug Administration website.
- 9  
10 21. Holford TR. The Analysis of Rates and of Survivorship Using Log-Linear Models. *Biometrics*. 1980;36(2). doi:10.2307/2529982
- 11  
12 22. Thompson MG, Burgess JL, Naleway AL, et al. Interim Estimates of Vaccine Effectiveness of BNT162b2 and mRNA-1273 COVID-19 Vaccines in Preventing SARS-CoV-2 Infection Among Health Care Personnel, First Responders, and Other Essential and Frontline Workers — Eight U.S. Locations, December 2020–March 2021. *MMWR Morbidity and Mortality Weekly Report*. 2021;70(13). doi:10.15585/mmwr.mm7013e3
- 13  
14  
15 23. Albania: WHO Coronavirus Disease (COVID-19) Dashboard With Vaccination Data. <https://covid19.who.int>.
- 16 24. Wouters OJ, Shadlen KC, Salcher-Konrad M, et al. Challenges in ensuring global access to COVID-19 vaccines: production, affordability, allocation, and deployment. *The Lancet*. 2021;397(10278). doi:10.1016/S0140-6736(21)00306-8
- 17  
18  
19 25. Thompson MG, Burgess JL, Naleway AL, et al. Interim Estimates of Vaccine Effectiveness of BNT162b2 and mRNA-1273 COVID-19 Vaccines in Preventing SARS-CoV-2 Infection Among Health Care Personnel, First Responders, and Other Essential and Frontline Workers — Eight U.S. Locations, December 2020–March 2021. *MMWR Morbidity and Mortality Weekly Report*. 2021;70(13). doi:10.15585/mmwr.mm7013e3
- 20  
21  
22 26. Sulcebe G, Ylli A, Cenko F, Kurti-Prifti. Rapid Increase of SARS-CoV-2 Seroprevalence during the 2020 Pandemic Year in the Population of the City of Tirana, Albania. *medRxiv* . Published online February 20, 2021.
- 23  
24 27. GeurtsvanKessel CH, Okba NMA, Igloi Z, et al. An evaluation of COVID-19 serological assays informs future diagnostics and exposure assessment. *Nature Communications*. 2020;11(1). doi:10.1038/s41467-020-17317-y
- 25  
26 28. Hansen CH, Michlmayr D, Gubbels SM, Mølbak K, Ethelberg S. Assessment of protection against reinfection with SARS-CoV-2 among 4 million PCR-tested individuals in Denmark in 2020: a population-level observational study. *The Lancet*. 2021;397(10280). doi:10.1016/S0140-6736(21)00575-4
- 27  
28  
29 29. Bernal JL, Gower C, Gallagher E, et al. Effectiveness of COVID-19 vaccines against the B.1.617.2 variant. <https://khub.net/documents/135939561/430986542/Effectiveness+of+COVID-19+vaccines+against+the+B16172+variant.pdf/204c11a4-e02e-11f2-db19-b3664107ac42>. Published online 2021.
- 30  
31  
32 30. Lopez Bernal J, Andrews N, Gower C, et al. Effectiveness of Covid-19 Vaccines against the B.1.617.2 (Delta) Variant. *New England Journal of Medicine*. Published online July 21, 2021. doi:10.1056/NEJMoa2108891
- 33  
34  
35  
36

### 37 Tables and Figures

38  
39  
40 Table 1. Knowledge gaps of Cohort Study to Measure COVID-19 Vaccine Effectiveness among Health Workers in Albania (COVE-AL), and study features intended to address them

| 43 Knowledge Gap                                                                                                                                                     | 43 Study Feature                                                                                                                                                           |
|----------------------------------------------------------------------------------------------------------------------------------------------------------------------|----------------------------------------------------------------------------------------------------------------------------------------------------------------------------|
| 44 <i>To measure the effectiveness of the COVID-19 vaccine against symptomatic and asymptomatic, laboratory-confirmed SARS CoV-2 infection among health workers</i>  |                                                                                                                                                                            |
| 46 To date, studies on real-world COVID-19 VE have been conducted in high-income settings. Limited data exists on real-world COVID-19 VE in middle income countries. | 46 This study will be conducted in Albania, an upper middle-income country in Eastern Europe.                                                                              |
| 49 The impact of the COVID-19 vaccine on the prevention of asymptomatic disease, an important driver of the COVID-19 pandemic, remains unclear.                      | 49 Participants with asymptomatic disease will be identified through quarterly serology testing, combined with weekly symptom screening.                                   |
| 53 VE may vary as new Variants of Concern COVID-19 circulate.                                                                                                        | 53 The study will be conducted over the course of a year, so new variants will likely be captured within the circulating population. Additionally, we will perform genetic |

54  
55  
56  
57  
58  
59  
60

|                                                                                                                                                                                                |                                                                                                                                                                                                                                                                                                    |
|------------------------------------------------------------------------------------------------------------------------------------------------------------------------------------------------|----------------------------------------------------------------------------------------------------------------------------------------------------------------------------------------------------------------------------------------------------------------------------------------------------|
|                                                                                                                                                                                                | sequencing on all positive samples to identify the circulating variants over the course of the study.                                                                                                                                                                                              |
| <i>Does Vaccine effectiveness vary by new strains of SARS-CoV-2?</i>                                                                                                                           |                                                                                                                                                                                                                                                                                                    |
| The literature is very sparse regarding the effects of previous infection and re-infection with SARS CoV-2 variants                                                                            | Sequencing of SARS-CoV-2 positive RT-PCRs will be completed.                                                                                                                                                                                                                                       |
| <i>To measure COVID-19 Vaccine effectiveness by Age</i>                                                                                                                                        |                                                                                                                                                                                                                                                                                                    |
| Limited data exists regarding VE across varying age groups                                                                                                                                     | A cross-section of hospital workers will be collected and final analysis will be stratified using age                                                                                                                                                                                              |
| <i>Duration of COVID-19 Vaccine Protection against infection</i>                                                                                                                               |                                                                                                                                                                                                                                                                                                    |
| There is limited data on the duration of VE                                                                                                                                                    | This is a 12-month study that will evaluate VE against PCR-confirmed symptomatic infection and quarterly seroconversion for the duration of the 12 months. Serology samples will be collected at 0, 3, 6, 9, 12 months testing for nucleocapsid protein presence to evaluate for natural infection |
| <i>To Measure the effectiveness the Covid-19 Vaccine in health workers previously infected with COVID-19.</i>                                                                                  |                                                                                                                                                                                                                                                                                                    |
| There is limited data on how long previous infection with disease confers protection against re-infection of SARS CoV-2                                                                        | We will evaluate the incidence of SARS-CoV-2 re-infection among previously infected health care workers comparing vaccinated to unvaccinated individuals.                                                                                                                                          |
| The utility of COVID-19 vaccine to prevent re-infection in individuals with previous SARS CoV-2 is not well understood.                                                                        | During the analysis, study participants will be stratified based previous infection prior to vaccination                                                                                                                                                                                           |
| <i>VE and duration of VE of one dose of vaccine against infection</i>                                                                                                                          |                                                                                                                                                                                                                                                                                                    |
| There is sparse data regarding incidence of SARS CoV-2 infection after only one dose of the Covid-19 vaccines                                                                                  | The study will measure VE, through the use of serology and PCR, in partially and fully vaccinated individuals.                                                                                                                                                                                     |
| <i>Variation in VE by degree of exposure to Covid 19 patients in the hospital setting and physical distancing practices outside the hospital</i>                                               |                                                                                                                                                                                                                                                                                                    |
| In healthcare workers, a population known to be at high risk for COVID-19, little is known about the impact of activities outside of the workplace is on the incidence of SARS CoV-2 infection | We will collect information about in-hospital exposure to COVID-19 patients and hospital ward of work for each participant and stratify our analysis accordingly in order to address this question.                                                                                                |

Table 2: Timing of questionnaires and specimen collection, Cohort Study to Measure COVID-19 Vaccine Effectiveness among Health Workers in Albania (COVE-AL)

| Timing in the study | Baseline | Weekly | For symptomatic participants | 30 days after a participant tests positive for SARS-CoV-2 | Every 3 months |
|---------------------|----------|--------|------------------------------|-----------------------------------------------------------|----------------|
|                     |          |        |                              |                                                           |                |

|                                               |   |   |   |   |   |
|-----------------------------------------------|---|---|---|---|---|
| Baseline questionnaire T1                     | X |   |   |   |   |
| Weekly Symptom questionnaire                  |   | X |   |   |   |
| Ad hoc symptom questionnaire                  |   |   | X |   |   |
| 30-day follow up of SARS-CoV-2-positive cases |   |   | X | X |   |
| Respiratory sample for PCR testing            | X |   | X |   |   |
| Serology                                      | X |   |   |   | X |

Table 3: Case Definition for Suspected symptomatic Covid-19 illness, Cohort Study to Measure COVID-19 Vaccine Effectiveness among Health Workers in Albania (COVE-AL).

- A participant with any of the following symptoms in the last 7 days is considered a suspected Covid-19 case and will have a respiratory swab collected:

- |                    |                       |                         |
|--------------------|-----------------------|-------------------------|
| • Fever            | • Sore throat         | • Diarrhea              |
| • Cough            | • Runny nose          | • Altered Mental Status |
| • General Weakness | • Shortness of breath | • Loss of taste         |
| • Fatigue          | • Lack of appetite    | • Loss of smell         |
| • Headache         | • Nausea              |                         |
| • Muscle Aches     | • Vomiting            |                         |

| Characteristics                 | n (%)     |
|---------------------------------|-----------|
| <b>Hospital</b>                 |           |
| Tirana University Hospital      | 942 (63)  |
| Durres Hospital                 | 300 (20)  |
| Fier Hospital                   | 262 (17)  |
| <b>Gender</b>                   |           |
| Male                            | 323 (21)  |
| Female                          | 1181 (79) |
| <b>If female, pregnant</b>      |           |
| Yes                             | 32 (2)    |
| No                              | 1149 (77) |
| <b>If female, breastfeeding</b> |           |
| Yes                             | 18 (1)    |
| No                              | 1163 (77) |
| <b>Age Group</b>                |           |
| 20-30                           | 269 (18)  |
| 31-40                           | 382 (25)  |
| 41-50                           | 373 (25)  |
| 51-60                           | 424 (28)  |

Table 4: Sociodemographic and clinical Characteristics, vaccination status, and SARS-CoV-2 serological status of Participants at Enrollment, Cohort Study to Measure COVID-19 Vaccine Effectiveness among Health Workers in Albania (COVE-AL).

|                                                                                          |           |
|------------------------------------------------------------------------------------------|-----------|
| Over 60                                                                                  | 56 (4)    |
| <b>Pre-existing Medical Conditions</b>                                                   |           |
| High blood pressure/Hypertension                                                         | 121 (8)   |
| Obesity                                                                                  | 80 (5)    |
| Diabetes                                                                                 | 41 (3)    |
| Chronic Lung Disease (such as asthma, COPD, bronchitis)                                  | 31(2)     |
| Chronic Heart Disease, excluding high blood pressure                                     | 29 (2)    |
| Autoimmune Disorder                                                                      | 29 (2)    |
| Cancer                                                                                   | 21 (1)    |
| Neurological Disease: including cerebrovascular disease, epilepsy and multiple sclerosis | 13 (0.8)  |
| Chronic Liver Disease (such as cirrhosis, hepatitis, fatty liver disease)                | 12 (0.8)  |
| Chronic Kidney Disease                                                                   | 7 (0.5)   |
| Immunocompromised, including solid organ transplant and HIV                              | 1 (0.06)  |
| <b>Smoking</b>                                                                           |           |
| Current or previous smoker                                                               | 273 (14)  |
| Never smoked                                                                             | 1231 (86) |
| <b>Occupation</b>                                                                        |           |
| Nurse                                                                                    | 691 (46)  |
| Medical Doctor                                                                           | 305 (20)  |
| Midwife                                                                                  | 30 (2)    |
| Laboratory Technician                                                                    | 42 (3)    |
| Biologist                                                                                | 0 (0)     |
| Pharmacist                                                                               | 8 (0.5)   |
| Janitorial Staff                                                                         | 190 (13)  |
| Food Worker                                                                              | 5 (0.3)   |
| Social Worker                                                                            | 6 (0.3)   |
| Radiology Technician                                                                     | 22 (1)    |
| Other*                                                                                   | 214 (14)  |
| <b>Clinical Health Worker (Hands on medical care)</b>                                    |           |
| Yes                                                                                      | 908 (60)  |
| No                                                                                       | 596 (40)  |
| <b>Received a positive laboratory test for SARS CoV-2 since January 2020</b>             |           |
| Yes                                                                                      | 536 (36)  |
| No                                                                                       | 968 (64)  |
| <b>If yes</b>                                                                            |           |
| PCR                                                                                      | 418 (28)  |
| Rapid test                                                                               | 47 (9)    |
| Serology                                                                                 | 54 (10)   |
| Don't know                                                                               | 36 (7)    |



|                                                         |           |
|---------------------------------------------------------|-----------|
| <b>Received at least 1 dose of the COVID-19 Vaccine</b> |           |
| Yes                                                     | 842 (56)  |
| No                                                      | 662 (44)  |
| <b>Brand of vaccine if yes</b>                          |           |
| Pfizer                                                  | 842 (56)  |
| <b>Enrollment PCR Results</b>                           |           |
| Positive                                                | 18 (1)    |
| Negative                                                | 1486 (99) |
| <b>Enrollment Serology Results</b>                      |           |
| Positive                                                | 1085 (72) |
| Negative                                                | 414 (28)  |
| Cut-off (borderline)                                    | 5 (0.3)   |

\*Other includes: accountant (10), administrative staff (55), archivist (1), scientist (4), couriers (5), drivers (20), economists (27), Information Technologists (2), Lawyer (5), specialists (29), police officer (5), psychologists (6), physiotherapists (5)

## Enrollment Questionnaire

### **INSTRUCTIONS:**

This survey will take about 5-10 minutes to complete. If you have any questions, please contact [XXXXXX] at [-XXXXXXXXXX] or email XXXXXXX.

Thank you again for your time.

### **A. Demographics, SARS-CoV-2 history and vaccination history**

A1. What is your age?

A2. Are you male or female?

A2a. If you are female:

Are you pregnant?: (If yes, specify trimester)

Are you Breastfeeding?:

A3. What is your height in cm?

A4. What is your weight in kg?

A5. Have you ever been diagnosed with any of the following?

- Cancer
- Chronic Heart Disease, excluding high blood pressure
- High blood pressure/Hypertension
- Chronic Kidney Disease
- Chronic Liver Disease (such as cirrhosis, hepatitis, fatty liver disease)
- Chronic Lung Disease (such as asthma, COPD, bronchitis, etc...)
- Diabetes
- Immunocompromised, including solid organ transplant and HIV
- Neurological Disease, including cerebrovascular disease, epilepsy, multiple sclerosis, etc...
- Obesity
- Autoimmune disorder

A6. Do you currently smoke?

- Yes
- No

1  
2  
3 *A6a: If no, have you smoked previously?*

4  Yes

5  No

6  
7  
8  
9 A7. How many people (not including yourself) do you live with?

10  0

11  1

12  2

13  3

14  4

15  5

16  6 or more

17  
18  
19  
20  
21  
22 A8. Since January 2020, have you ever received a positive laboratory test for SARS-CoV-2, the  
23 virus that causes COVID-19?

24  
25  Yes

26  No

27  
28  
29  
30 A8a. If yes, when was the positive test (date), and what kind of test was performed (PCR or rapid  
31 test or serology)

32  PCR (nasal swab)

33  Rapid Test (nasal swab)

34  Serology Test (a blood test)

35  Don't remember

36  
37  
38  
39 Date of Test \_\_\_\_\_

40  
41 (Allow option for multiple positive test results)

42  
43  
44 **COVID 19 Vaccination Questions**

45 A9. When the COVID -19 vaccine becomes available, what are the chances that you will choose  
46 to receive a COVID-19 vaccination if you are offered one?

47  Almost Zero Chance

48  Very Small Chance

49  Small

50  Moderate

51  Large

52  Very Large Chance

Almost Certain

I have already received a COVID-19 vaccine: Date: \_\_\_\_\_

| <b>Vaccination history</b>                                                           |                                                                                                                                                                                                                                           |
|--------------------------------------------------------------------------------------|-------------------------------------------------------------------------------------------------------------------------------------------------------------------------------------------------------------------------------------------|
| <b>COVID vaccine</b>                                                                 |                                                                                                                                                                                                                                           |
| 1. Do you have a contraindication for the COVID-19 vaccine?                          | <input type="checkbox"/> Yes <input type="checkbox"/> No <input type="checkbox"/> Unknown                                                                                                                                                 |
| 2. Have you received the first dose of any COVID-19 vaccine?                         | <input type="checkbox"/> Yes <input type="checkbox"/> No <input type="checkbox"/> Unknown                                                                                                                                                 |
| 3. If yes, what was the date of the first dose? (dd/mm/yyyy)                         | ___/___/___                                                                                                                                                                                                                               |
| 4. Which vaccine did you receive? (product name)                                     |                                                                                                                                                                                                                                           |
| 5. Mode of vaccine ascertainment (to be the verified by study staff)                 | <input type="checkbox"/> = vaccination card<br><input type="checkbox"/> = vaccination registry<br><input type="checkbox"/> = self-report<br><input type="checkbox"/> = other (specify _____)<br><input type="checkbox"/> = not documented |
| 6. What was the Batch of the vaccine received?                                       | Please provide the match number from the above documents or state <input type="checkbox"/> Unknown                                                                                                                                        |
| 7. Have you received a second dose of the COVID-19 vaccine?                          | <input type="checkbox"/> Yes <input type="checkbox"/> No <input type="checkbox"/> Unknown                                                                                                                                                 |
| 8. If yes, what day did you receive the second dose (dd/mm/yyyy)                     | ___/___/___                                                                                                                                                                                                                               |
| 9. Which kind of vaccine did you receive for the second dose (product name)          |                                                                                                                                                                                                                                           |
| 10. What was the Batch number of the second dose vaccine you received?               | Please provide the match number from the ascertainment documents or state <input type="checkbox"/> Unknown                                                                                                                                |
| 11. Mode of vaccine ascertainment of the second dose (to be verified by study staff) | <input type="checkbox"/> = vaccination card<br><input type="checkbox"/> = vaccination registry<br><input type="checkbox"/> = self-report<br><input type="checkbox"/> = other (specify _____)                                              |

|  |                                           |
|--|-------------------------------------------|
|  | <input type="checkbox"/> = not documented |
|--|-------------------------------------------|

Did you receive the influenza vaccine in the past winter (since September 2020)?

Yes

No

## B. Occupation and Work Responsibilities

B1. In what departments, wards, or parts of your health facility do you regularly work? Check all that apply.

- Hospital
- Emergency Department
- Critical Care or Intensive Care Unit
- Infectious Diseases
- Lung diseases
- Internal Medicine and/or Medical Specialties
- Pediatrics and/or Pediatric Specialties
- Surgery and/or Surgical Specialties
- Gynecology and/or Obstetrics
- Oncology and/or Hematology
- Dentistry
- Radiology
- Outpatient clinic
- Pharmacy
- Laboratory
- Nutrition
- Social Assistance
- Physiotherapy
- Occupational therapy
- Other*

B1a: \_Other department or ward, please SPECIFY: \_\_\_\_\_

B2. What is your current job/occupation at the hospital?

- Nurse
- Medical doctor
- Midwife

- 1  
2  
3  Laboratory technician  
4  Biologist  
5  Pharmacist  
6  Janitorial staff  
7  Food worker  
8  Social Worker  
9  Radiology Technician  
10  *Other*  
11  
12  
13  
14  
15

16  
17 B3. With which groups of patients do you have regular or daily face-to-face contact? Check  
18 all that apply.  
19

- 20  Infants aged <1 year  
21  Children aged 1-12 years  
22  Teenagers aged 13-19  
23  Adults aged 20-64  
24  Older adults aged 65 and older  
25  Pregnant women  
26  
27  
28  
29  
30  
31

32 B4. Are you a clinical health worker (such as a doctor, nurse, or medical technician) who  
33 provides hands-on medical care to patients?  
34

- 35  Yes  
36  No  
37  
38

39 B4a. [If B4= "Yes"] Do you perform any of the following procedures regularly (on  
40 most workdays)? This means you do this task yourself (and not simply oversee).  
41 Check any or all that apply.  
42  
43

- 44  Collect a respiratory specimen using a swab  
45  Collect a sputum specimen  
46  Administer medication using a nebulizer  
47  Apply nasal cannula (two pronged tube for nasal oxygen)  
48  Apply oxygen face mask  
49  Perform tracheal intubation  
50  Insert a nasogastric (feeding) tube  
51  Perform manual ventilation  
52  Apply mechanical ventilation  
53  
54  
55  
56  
57  
58  
59  
60

- Perform suction of fluids or secretions
- Perform chest physiotherapy (such as chest percussion)
- Perform bedside bronchoscopy

**C. Health Status**

C1. How would you describe your current health overall?

- Excellent
- Very Good
- Good
- Fair
- Poor

**E. Questions about Illness, Vaccines, and Missing Work**

E1. How much do you know about the Covid-19 vaccine?

- Nothing at all
- A little
- Some
- A lot
- A great deal

E2. COVID-19 vaccination is safe.

- Strongly agree
- Mildly agree
- Neutral
- Mildly disagree
- Strongly disagree

E3. If you are unable to or don't get a COVID-19 vaccination, what do you think your chance of getting the COVID-19 will be?

- Almost Zero Chance
- Very Small Chance
- Small
- Moderate
- Large
- Very Large Chance

- 1  
2  
3  
4  
5  
6  
7  
8  
9  
10  
11  
12  
13  
14  
15  
16  
17  
18  
19  
20  
21  
22  
23  
24  
25  
26  
27  
28  
29  
30  
31  
32  
33  
34  
35  
36  
37  
38  
39  
40  
41  
42  
43  
44  
45  
46  
47  
48  
49  
50  
51  
52  
53  
54  
55  
56  
57  
58  
59  
60
- E4. How effective do you think the COVID-19 vaccine is in preventing you from getting sick with COVID-19?
- Extremely effective
  - Very effective
  - Somewhat effective
  - Not too effective
  - Not at all effective
- E5. If you get a COVID-19 vaccination, what do you think your chance of getting sick with COVID-19 will be this year...?
- Almost Zero Chance
  - Very Small Chance
  - Small Chance
  - Moderate Chance
  - Large Chance
  - Very Large Chance
- E6. If I get an COVID-19 vaccination, I will be less likely to miss work because of getting sick with COVID-19.
- Strongly agree
  - Mildly agree
  - Neutral
  - Mildly disagree
  - Strongly disagree
- E7. Compared to your co-workers at your health facility, how favorable or unfavorable is your attitude toward COVID-19 vaccination?
- Extremely more favorable
  - Much more favorable
  - Slightly more favorable
  - Average for co-workers at my facility
  - Slightly less favorable
  - Much less favorable
  - Extremely less favorable
- E8. If I don't get a COVID-19 vaccination, I will regret it.
- Strongly agree



- Mildly agree  
 Neutral  
 Mildly disagree  
 Strongly disagree

E9. How worried are you about getting sick with COVID-19 during the next 12 months?

- Extremely worried  
 Very worried  
 Moderately worried  
 A little worried  
 Not at all worried

E10. I get sick with influenza and other respiratory viruses more easily than other people my age.

- Strongly agree  
 Mildly agree  
 Neutral  
 Mildly disagree  
 Strongly disagree

E11. Employees at my healthcare facility are encouraged to go home if they have respiratory symptoms at work.

- Strongly agree  
 Mildly agree  
 Neutral  
 Mildly disagree  
 Strongly disagree

**F. Questions about life outside of work in the past 7 days**

|                                                                                                                                                                            |                                                                                                                                                                  |
|----------------------------------------------------------------------------------------------------------------------------------------------------------------------------|------------------------------------------------------------------------------------------------------------------------------------------------------------------|
| F1. Outside of the healthcare setting/your workplace, have you been in close contact with a confirmed COVID-19 patient or a person with COVID-19 symptoms?                 | <input type="checkbox"/> Yes<br><input type="checkbox"/> No<br><input type="checkbox"/> Unknown                                                                  |
| F2. How many times have you used public transportation besides a family car (public bus, train)?                                                                           | <input type="checkbox"/> 0<br><input type="checkbox"/> 1-2<br><input type="checkbox"/> 3-5<br><input type="checkbox"/> 5-8<br><input type="checkbox"/> 9 or more |
| F3. How many times have you attended a social indoor social event or gathering with MORE than 10 people? (This includes activities such as attending church/other house of | <input type="checkbox"/> 0<br><input type="checkbox"/> 1-2<br><input type="checkbox"/> 3-5                                                                       |

|                                                 |                                                                                                       |                                                                                                                                                                                                                                                      |
|-------------------------------------------------|-------------------------------------------------------------------------------------------------------|------------------------------------------------------------------------------------------------------------------------------------------------------------------------------------------------------------------------------------------------------|
| 1<br>2<br>3<br>4<br>5<br>6<br>7<br>8<br>9<br>10 | worship, parties, weddings, and sporting events, or visiting a bar or restaurant).                    | <input type="checkbox"/> 5-8<br><input type="checkbox"/> 9 or more                                                                                                                                                                                   |
| 11<br>12<br>13<br>14<br>15<br>16                | F4. How often have you worn a mask when in an indoor setting outside of your home?                    | <input type="checkbox"/> always<br><input type="checkbox"/> often<br><input type="checkbox"/> sometimes<br><input type="checkbox"/> rarely<br><input type="checkbox"/> never<br><input type="checkbox"/> did not go to indoor locations outside home |
| 17<br>18<br>19<br>20<br>21                      | F5. How often have you stayed at least 2 metres from other people in indoor spaces outside your home? | <input type="checkbox"/> always<br><input type="checkbox"/> often<br><input type="checkbox"/> sometimes<br><input type="checkbox"/> rarely<br><input type="checkbox"/> never<br><input type="checkbox"/> did not go to indoor locations outside home |
| 22<br>23<br>24<br>25<br>26                      | F6. How many times have people who do not live in your household visited your home?                   | <input type="checkbox"/> always<br><input type="checkbox"/> often<br><input type="checkbox"/> sometimes<br><input type="checkbox"/> rarely<br><input type="checkbox"/> never                                                                         |
| 27<br>28<br>29<br>30<br>31<br>32<br>33          | F7. How many times have you visited other people in their homes?                                      | <input type="checkbox"/> always<br><input type="checkbox"/> often<br><input type="checkbox"/> sometimes<br><input type="checkbox"/> rarely<br><input type="checkbox"/> never<br><input type="checkbox"/> did not go to indoor locations outside home |

**Recent Symptoms:**

**In the past (7) days, have you experienced any of the following symptoms (check all that apply):**

- Fever
- Cough
- General Weakness
- Fatigue
- Headache
- Muscle aches
- Sore Throat
- Runny Nose
- Shortness of Breath
- Lack of Appetite
- Nausea
- Vomiting
- Diarrhea
- Altered Mental Status
- Loss of Taste
- Loss of Smell

1  
2  
3 If yes to any of symptoms:  
4

5  
6 Date of onset of first symptom: \_\_\_\_\_  
7

8 Did you see a doctor for your symptoms?  
9

10  Yes

11  No  
12

13  
14 Did you go to an emergency room?

15  Yes

16  No  
17

18  
19 Did you get hospitalized for your symptoms?

20  Yes

21  No  
22

23  
24 Did you get tested for SARS-CoV-2?

25  Yes

26  No  
27

28  
29 If yes, what test was done, check all that apply:

30  Rapid test (Nasal Swab)

31  PCR (Nasal Swab)

32  Blood test

33  Xray or CT scan  
34  
35  
36

37 What were the results?

38  Covid-19 Positive

39  Covid-19 Negative  
40  
41  
42  
43  
44  
45  
46  
47  
48  
49  
50  
51  
52  
53  
54  
55  
56  
57  
58  
59  
60

## Weekly symptom follow-up questionnaire

Have you received the COVID-19 vaccine?

- Yes I have received two does of COVID vaccine  
 Yes I have received only one dose of COVID vaccine  
 No I have not received any doses of COVID vaccines

In the past 7 days, or since you last filled out this questionnaire, have you received the COVID-19 Vaccine?

- Yes  
 No

|                                                                      |                                                                                                                                                                                                                                           |
|----------------------------------------------------------------------|-------------------------------------------------------------------------------------------------------------------------------------------------------------------------------------------------------------------------------------------|
| 1. If yes, what was the date of the dose?<br>(dd/mm/yyyy)            | ___/___/___                                                                                                                                                                                                                               |
| 2. Which vaccine did you receive? (product name)                     | List options                                                                                                                                                                                                                              |
| 3. Mode of vaccine ascertainment (to be the verified by study staff) | <input type="checkbox"/> = vaccination card<br><input type="checkbox"/> = vaccination registry<br><input type="checkbox"/> = self-report<br><input type="checkbox"/> = other (specify _____)<br><input type="checkbox"/> = not documented |
| 4. What was the Batch of the vaccine received?                       | Please provide the match number from the above documents or state <input type="checkbox"/> Unknown                                                                                                                                        |

For women, when you received the vaccine, were you pregnant?

- Yes (if yes, specify trimester)  
 No

**In the past (7) days, have you experienced any of the following symptoms (check all that apply):**

- Fever  
 Cough  
 General Weakness  
 Fatigue

- 1  
2  
3  Headache  
4  Muscle aches  
5  Sore Throat  
6  Runny Nose  
7  Shortness of Breath  
8  Lack of Appetite  
9  Nausea  
10  Vomiting  
11  Diarrhea  
12  Altered Mental Status  
13  Loss of Taste  
14  Loss of Smell  
15  I have not experienced any of these symptoms in the past 7 days or since I last filled

16  
17  
18  
19  
20 out this questionnaire  
21  
22  
23

24 If yes to any of symptoms:  
25  
26

27 Date of onset of first symptom: \_\_\_\_\_  
28  
29

30 Did you see a doctor for your symptoms?  
31

- 32  Yes  
33  No  
34

35 Did you go to an emergency room?  
36

- 37  Yes  
38  No  
39

40 Did you get hospitalized for your symptoms?  
41

- 42  Yes  
43  No  
44

45 Did you get tested for SARS-CoV-2?  
46

- 47  Yes  
48  No  
49

50  
51 If yes, what test was done, check all that apply:

- 52  Rapid test  
53  PCR Nasal Swab  
54  Blood test  
55  
56  
57  
58  
59  
60

Xray or CT scan

What were the results?

Covid-19 Positive

Covid-19 Negative

### **Questions about life outside of work in the past 7 days**

|                                                                                                                                                                                                                                                               |                                                                                                                                                                                                                                                      |
|---------------------------------------------------------------------------------------------------------------------------------------------------------------------------------------------------------------------------------------------------------------|------------------------------------------------------------------------------------------------------------------------------------------------------------------------------------------------------------------------------------------------------|
| F1. Outside of the healthcare setting/your workplace, have you been in close contact with a confirmed COVID-19 patient or a person with COVID-19 symptoms?                                                                                                    | <input type="checkbox"/> Yes<br><input type="checkbox"/> No<br><input type="checkbox"/> Unknown                                                                                                                                                      |
| F2. How many times have you used public transportation besides a family car (public bus, train)?                                                                                                                                                              | <input type="checkbox"/> 0<br><input type="checkbox"/> 1-2<br><input type="checkbox"/> 3-5<br><input type="checkbox"/> 5-8<br><input type="checkbox"/> 9 or more                                                                                     |
| F3. How many times have you attended a social indoor social event or gathering with MORE than 10 people? (This includes activities such as attending church/other house of worship, parties, weddings, and sporting events, or visiting a bar or restaurant). | <input type="checkbox"/> 0<br><input type="checkbox"/> 1-2<br><input type="checkbox"/> 3-5<br><input type="checkbox"/> 5-8<br><input type="checkbox"/> 9 or more                                                                                     |
| F4. How often have you worn a mask when in an indoor setting outside of your home?                                                                                                                                                                            | <input type="checkbox"/> always<br><input type="checkbox"/> often<br><input type="checkbox"/> sometimes<br><input type="checkbox"/> rarely<br><input type="checkbox"/> never<br><input type="checkbox"/> did not go to indoor locations outside home |
| F5. How often have you stayed at least 2 metres from other people in indoor spaces outside your home?                                                                                                                                                         | <input type="checkbox"/> always<br><input type="checkbox"/> often<br><input type="checkbox"/> sometimes<br><input type="checkbox"/> rarely<br><input type="checkbox"/> never<br><input type="checkbox"/> did not go to indoor locations outside home |
| F6. How many times have people who do not live in your household visited your home?                                                                                                                                                                           | <input type="checkbox"/> always<br><input type="checkbox"/> often<br><input type="checkbox"/> sometimes<br><input type="checkbox"/> rarely<br><input type="checkbox"/> never                                                                         |
| F7. How many times have you visited other people in their homes?                                                                                                                                                                                              | <input type="checkbox"/> always<br><input type="checkbox"/> often<br><input type="checkbox"/> sometimes<br><input type="checkbox"/> rarely<br><input type="checkbox"/> never<br><input type="checkbox"/> did not go to indoor locations outside home |

## Questionnaire for following up ad hoc symptomatic participants

**In last 7 days, have you had any of the following symptoms (check all that apply):**

- Fever
- Cough
- General Weakness
- Fatigue
- Headache
- Muscle Aches
- Sore Throat
- Runny Nose
- Shortness of Breath
- Lack of Appetite
- Nausea
- Vomiting
- Diarrhea
- Altered Mental Status
- Loss of Taste
- Loss of Smell
- Other

If yes to any of symptoms:

Date of onset of first symptom: \_\_\_\_\_

If the participant has had symptoms in the past 7 days that meet the case definition (see below), a respiratory specimen should be collected and the participant should be instructed to quarantine until test results are available, in according with Albania Ministry of Health and Social Protection guidelines.

A participant should be considered a suspected case of COVID-19 for this study if the following criteria are met

- Acute (in the previous 7 days) onset of fever or cough OR
- acute onset of one or more of the following symptoms in the previous 7 days: General weakness/fatigue, headache, myalgia, sore throat, coryza, dyspnoea, anorexia/nausea/vomiting, diarrhoea, altered mental status, anosmia, ageusia.

1  
2  
3  
4  
5  
6  
7  
8  
9  
10  
11  
12  
13  
14  
15  
16  
17  
18  
19  
20  
21  
22  
23  
24  
25  
26  
27  
28  
29  
30  
31  
32  
33  
34  
35  
36  
37  
38  
39  
40  
41  
42  
43  
44  
45  
46  
47  
48  
49  
50  
51  
52  
53  
54  
55  
56  
57  
58  
59  
60

For peer review only



1  
2  
3  
4 Questionnaire for following up positive COVID-19 cases 30 days after  
5 positive test  
6  
7

8 **Since the day of your positive test (xxx Date), how many days were you sick for?**  
9

- 10  \_\_\_ days  
11  
12  I am still feeling ill  
13

14 If you are still feeling ill, which of the following symptoms do you have?  
15

- 16  
17  Fever  
18  Cough  
19  General Weakness  
20  Fatigue  
21  Headache  
22  Muscle Aches  
23  Sore Throat  
24  Runny Nose  
25  Shortness of Breath  
26  Lack of Appetite  
27  Nausea  
28  Vomiting  
29  Diarrhea  
30  Altered Mental Status  
31  Loss of Taste  
32  Loss of Smell  
33  Other  
34  
35  
36  
37  
38  
39  
40

41 During the course of your COVID-19 illness, did you see a doctor for your symptoms?  
42

- 43  Yes  
44  No  
45

46 During the course of your COVID-19 illness, did you go to an emergency room?  
47

- 48  Yes  
49  No  
50

51 Did you get hospitalized for your COVID-19 illness?  
52

- 53  Yes  
54  No  
55

56 If yes, how many days were you hospitalized for:  
57

- 58  \_\_ XX days  
59  Still hospitalized  
60

1  
2  
3  
4  
5  
6 Did you receive oxygen for your symptoms?

7  Yes

8  No

9  
10  
11 Did you require ICU care?

12  Yes

13  No

14  
15  
16 Did you require intubation?

17  Yes

18  No

19  
20  
21  
22 For participants who were hospitalized during the course of their illness, staff should record if at  
23 the 30-day questionnaire the participant was

24  Still in hospital

25  Discharged from hospital

26  Deceased  
27  
28  
29  
30  
31  
32  
33  
34  
35  
36  
37  
38  
39  
40  
41  
42  
43  
44  
45  
46  
47  
48  
49  
50  
51  
52  
53  
54  
55  
56  
57  
58  
59  
60

STROBE Statement—Checklist of items that should be included in reports of *cohort studies*

|                           | Item No | Recommendation                                                                                                                                                                                                                                                                                                         | Page No |
|---------------------------|---------|------------------------------------------------------------------------------------------------------------------------------------------------------------------------------------------------------------------------------------------------------------------------------------------------------------------------|---------|
| <b>Title and abstract</b> | 1       | (a) Indicate the study's design with a commonly used term in the title or the abstract<br>(b) Provide in the abstract an informative and balanced summary of what was done and what was found                                                                                                                          | 1       |
| <b>Introduction</b>       |         |                                                                                                                                                                                                                                                                                                                        |         |
| Background/rationale      | 2       | Explain the scientific background and rationale for the investigation being reported                                                                                                                                                                                                                                   | 3-4     |
| Objectives                | 3       | State specific objectives, including any prespecified hypotheses                                                                                                                                                                                                                                                       | 4       |
| <b>Methods</b>            |         |                                                                                                                                                                                                                                                                                                                        |         |
| Study design              | 4       | Present key elements of study design early in the paper                                                                                                                                                                                                                                                                | 6       |
| Setting                   | 5       | Describe the setting, locations, and relevant dates, including periods of recruitment, exposure, follow-up, and data collection                                                                                                                                                                                        | 5       |
| Participants              | 6       | (a) Give the eligibility criteria, and the sources and methods of selection of participants. Describe methods of follow-up<br>(b) For matched studies, give matching criteria and number of exposed and unexposed                                                                                                      | 5       |
| Variables                 | 7       | Clearly define all outcomes, exposures, predictors, potential confounders, and effect modifiers. Give diagnostic criteria, if applicable                                                                                                                                                                               | 10-12   |
| Data sources/measurement  | 8*      | For each variable of interest, give sources of data and details of methods of assessment (measurement). Describe comparability of assessment methods if there is more than one group                                                                                                                                   | 6-8     |
| Bias                      | 9       | Describe any efforts to address potential sources of bias                                                                                                                                                                                                                                                              | 5, 15   |
| Study size                | 10      | Explain how the study size was arrived at                                                                                                                                                                                                                                                                              | 8       |
| Quantitative variables    | 11      | Explain how quantitative variables were handled in the analyses. If applicable, describe which groupings were chosen and why                                                                                                                                                                                           | 10      |
| Statistical methods       | 12      | (a) Describe all statistical methods, including those used to control for confounding<br>(b) Describe any methods used to examine subgroups and interactions<br>(c) Explain how missing data were addressed<br>(d) If applicable, explain how loss to follow-up was addressed<br>(e) Describe any sensitivity analyses | 10      |
| <b>Results</b>            |         |                                                                                                                                                                                                                                                                                                                        |         |
| Participants              | 13*     | (a) Report numbers of individuals at each stage of study—eg numbers potentially eligible, examined for eligibility, confirmed eligible, included in the study, completing follow-up, and analysed<br>(b) Give reasons for non-participation at each stage<br>(c) Consider use of a flow diagram                        | 5, 12   |
| Descriptive data          | 14*     | (a) Give characteristics of study participants (eg demographic, clinical, social) and information on exposures and potential confounders<br>(b) Indicate number of participants with missing data for each variable of interest<br>(c) Summarise follow-up time (eg, average and total amount)                         | 12      |
| Outcome data              | 15*     | Report numbers of outcome events or summary measures over time                                                                                                                                                                                                                                                         | n/a     |

|    |                          |    |                                                                                                                                                                                                              |       |
|----|--------------------------|----|--------------------------------------------------------------------------------------------------------------------------------------------------------------------------------------------------------------|-------|
| 1  | Main results             | 16 | (a) Give unadjusted estimates and, if applicable, confounder-adjusted estimates and their precision (eg, 95% confidence interval). Make clear which confounders were adjusted for and why they were included | n/a   |
| 2  |                          |    | (b) Report category boundaries when continuous variables were categorized                                                                                                                                    |       |
| 3  |                          |    | (c) If relevant, consider translating estimates of relative risk into absolute risk for a meaningful time period                                                                                             |       |
| 4  | Other analyses           | 17 | Report other analyses done—eg analyses of subgroups and interactions, and sensitivity analyses                                                                                                               | n/a   |
| 5  | <b>Discussion</b>        |    |                                                                                                                                                                                                              |       |
| 6  | Key results              | 18 | Summarise key results with reference to study objectives                                                                                                                                                     | 13-14 |
| 7  | Limitations              | 19 | Discuss limitations of the study, taking into account sources of potential bias or imprecision. Discuss both direction and magnitude of any potential bias                                                   | 15    |
| 8  | Interpretation           | 20 | Give a cautious overall interpretation of results considering objectives, limitations, multiplicity of analyses, results from similar studies, and other relevant evidence                                   | 13-14 |
| 9  | Generalisability         | 21 | Discuss the generalisability (external validity) of the study results                                                                                                                                        | 15    |
| 10 | <b>Other information</b> |    |                                                                                                                                                                                                              |       |
| 11 | Funding                  | 22 | Give the source of funding and the role of the funders for the present study and, if applicable, for the original study on which the present article is based                                                | 16    |

\*Give information separately for exposed and unexposed groups.

**Note:** An Explanation and Elaboration article discusses each checklist item and gives methodological background and published examples of transparent reporting. The STROBE checklist is best used in conjunction with this article (freely available on the Web sites of PLoS Medicine at <http://www.plosmedicine.org/>, Annals of Internal Medicine at <http://www.annals.org/>, and Epidemiology at <http://www.epidem.com/>). Information on the STROBE Initiative is available at <http://www.strobe-statement.org>.

# BMJ Open

## COVID-19 vaccine effectiveness among health-care workers in Albania (COVE-AL): protocol for a prospective cohort study and cohort baseline data

|                                 |                                                                                                                                                                                                                                                                                                                                                                                                                                                                                                                                                                                                                                                                                                                                                                                                                                                                                                                                                                                                                                                             |
|---------------------------------|-------------------------------------------------------------------------------------------------------------------------------------------------------------------------------------------------------------------------------------------------------------------------------------------------------------------------------------------------------------------------------------------------------------------------------------------------------------------------------------------------------------------------------------------------------------------------------------------------------------------------------------------------------------------------------------------------------------------------------------------------------------------------------------------------------------------------------------------------------------------------------------------------------------------------------------------------------------------------------------------------------------------------------------------------------------|
| Journal:                        | <i>BMJ Open</i>                                                                                                                                                                                                                                                                                                                                                                                                                                                                                                                                                                                                                                                                                                                                                                                                                                                                                                                                                                                                                                             |
| Manuscript ID                   | bmjopen-2021-057741.R1                                                                                                                                                                                                                                                                                                                                                                                                                                                                                                                                                                                                                                                                                                                                                                                                                                                                                                                                                                                                                                      |
| Article Type:                   | Protocol                                                                                                                                                                                                                                                                                                                                                                                                                                                                                                                                                                                                                                                                                                                                                                                                                                                                                                                                                                                                                                                    |
| Date Submitted by the Author:   | 20-Jan-2022                                                                                                                                                                                                                                                                                                                                                                                                                                                                                                                                                                                                                                                                                                                                                                                                                                                                                                                                                                                                                                                 |
| Complete List of Authors:       | Sridhar, Shela; Boston Children's Hospital, Global Health Program Fico, Albana; Institute of Public Health<br>Preza, Iria; Institute of Public Health<br>Hatibi, Iris; Institute of Public Health<br>Sulo, Jonilda; Southeast European Center for Surveillance and Control of Infectious Disease<br>Kissling, Esther ; Epiconcept SAS<br>Daja, Rovena; Institute of Public Health<br>Ibrahim, Rawi; WHO Regional Office for Europe<br>Lemos, Diogo; WHO Regional Office for Europe<br>Rubin-Smith, Julia; Boston Children's Hospital<br>Schmid, Alexis; Boston Children's Hospital<br>Vasili, Adela; Institute of Public Health<br>Valenciano, M; EpiConcept<br>Jorgensen, Pernille; World Health Organization, Regional Office for Europe;<br>Pebody, Richard; World Health Organization Regional Office for Europe<br>Lafond, Kathryn; CDC Atlanta<br>Katz, Mark ; World Health Organization Regional Office for Europe<br>Bino, Silvia; Institute of Public Health, Southern European Centre for Surveillance and Control of Infectious Diseases (SECID) |
| <b>Primary Subject Heading</b>: | Public health                                                                                                                                                                                                                                                                                                                                                                                                                                                                                                                                                                                                                                                                                                                                                                                                                                                                                                                                                                                                                                               |
| Secondary Subject Heading:      | Infectious diseases, Global health, Health policy                                                                                                                                                                                                                                                                                                                                                                                                                                                                                                                                                                                                                                                                                                                                                                                                                                                                                                                                                                                                           |
| Keywords:                       | COVID-19, Infection control < INFECTIOUS DISEASES, Public health < INFECTIOUS DISEASES                                                                                                                                                                                                                                                                                                                                                                                                                                                                                                                                                                                                                                                                                                                                                                                                                                                                                                                                                                      |
|                                 |                                                                                                                                                                                                                                                                                                                                                                                                                                                                                                                                                                                                                                                                                                                                                                                                                                                                                                                                                                                                                                                             |

SCHOLARONE™  
Manuscripts

1  
2  
3 **COVID-19 vaccine effectiveness among health-care workers in Albania (COVE-AL): protocol for a**  
4 **prospective cohort study and cohort baseline data**  
5  
6  
7

8  
9 **Current Manuscript Word Count** (not including title, references, tables/figures): 3798  
10

11 **Abstract word count:** 300  
12  
13

14  
15  
16 **Authors:** Shela Sridhar, MD, MPH<sup>1,2</sup>, Albana Fico, MD, PhD<sup>3</sup>, Iria Preza, MPH<sup>3</sup>, Iris Hatibi, MPH, PhD<sup>3</sup>,  
17  
18 Jonilda Sulo, MPH<sup>4</sup>, Esther Kissling, MSc<sup>5</sup>, Rovena Daja MD, MPH<sup>3</sup>, Rawi Ibrahim, MPH<sup>6</sup>, Diogo Lemos,  
19  
20 Mr<sup>6</sup>, Julia Rubin-Smith, MD, MSPH, CTropMed<sup>1</sup>, Alexis Schmid, MS, DNP, DTN<sup>1</sup>, Adela Vasili, MD<sup>3</sup>,  
21  
22 Marta Valenciano, PhD<sup>5</sup>, Pernille Jorgensen, MSc, MPH<sup>6</sup>, Richard Pebody, MBChB<sup>6</sup>, Kathryn Lafond,  
23  
24 MPH<sup>7</sup>, Mark A. Katz, MD<sup>6</sup>, Silvia Bino MD, PhD<sup>3</sup>  
25

26 <sup>1</sup>Boston Children's Hospital Global Health Program, Boston, MA, USA

27 <sup>2</sup>Brigham and Women's Hospital, Department of Global Health Equity, Boston, MA, USA

28 <sup>3</sup>Institute of Public Health, Tirana, Albania

29 <sup>4</sup>Southeast European Center for Surveillance and Control of Infectious Disease, Tirana, Albania

30 <sup>5</sup>Epicconcept, Paris, France

31 <sup>6</sup>WHO Regional Office for Europe, Copenhagen, Denmark

32 <sup>7</sup>US CDC, Atlanta, GA, USA  
33  
34

35 \*Corresponding author: shela.sridhar@childrens.harvard.edu  
36

37 **Abstract**  
38

39 *Introduction:* Critical questions remain about COVID-19 vaccine effectiveness (VE) in real-world settings,  
40 particularly in middle-income countries. We describe a study protocol to evaluate COVID-19 VE in  
41 preventing laboratory-confirmed SARS-CoV-2 infection in health workers (HWs) in Albania, an upper-  
42 middle-income country.  
43  
44  
45  
46

47 *Methods and analysis:* In this 12-month prospective cohort study, we enrolled HWs at three hospitals in  
48 Albania. HWs are vaccinated through the routine COVID-19 vaccine campaign. Participants completed a  
49 baseline survey about demographics, clinical comorbidities, and infection risk behaviors. Baseline serology  
50 samples were also collected and tested against the SARS-CoV-2 spike protein, and respiratory swabs were  
51  
52  
53  
54  
55  
56  
57  
58  
59  
60

1  
2  
3 collected and tested for SARS-CoV-2 by RT-PCR. Participants complete weekly symptom questionnaires  
4 and symptomatic participants have a respiratory swab collected, which is tested for SARS-CoV-2. At 3, 6,  
5  
6  
7 9 months and 12 months of the study, serology will be collected and tested for antibodies against the SARS-  
8  
9  
10 CoV-2 nucleocapsid protein and spike protein. VE will be estimated using a piece-wise proportional  
11  
12 hazards model ( $VE = 1 - \text{hazard ratio [HR]}$ ).

13  
14 *Baseline data:* From February to May 2021, 1504 HWs were enrolled. The median age was 44 (range: 22-  
15  
16 71) and 78% were female. At enrollment, 72% of participants were seropositive for SARS-CoV-2. 56% of  
17  
18 participants were vaccinated with one dose, of whom 98% received their first shot within 4 days of  
19  
20 enrollment. All HWs received the Pfizer BNT162b2 mRNA COVID-19 vaccine.

21  
22 *Ethics and dissemination:* The study protocol and procedures were reviewed and approved by the WHO  
23  
24 Ethical Review Board, reference number CERC.0097A, and the Albanian Institute of Public Health (IPH)  
25  
26 Ethical Review Board, reference number 156. All participants have provided written informed consent to  
27  
28 participate in this study. The primary results of this study will be published in a peer-reviewed journal at  
29  
30 the time of completion.

31  
32  
33 *Registration:* This study has been registered with ClinicalTrials.gov (NCT04811391).

### 34 35 36 37 **Strengths and limitations of this study**

- 38  
39 • This study is a rigorous, prospective vaccine effectiveness study using standardized methodology  
40  
41 in an upper middle-income country.
  - 42  
43 • This study includes serology testing at regular intervals and PCR testing for symptomatic  
44  
45 individuals, and therefore will allow us to identify asymptomatic and symptomatic SARS CoV-2  
46  
47 infections.
  - 48  
49 • As the SARS-CoV-2 pandemic continues to evolve, and new variants emerge, we will be able to  
50  
51 quantify re-infection in previously infected individuals.
- 52  
53  
54  
55  
56  
57  
58  
59  
60

- Our study is composed of health workers, who may have different rates of exposure to COVID-19 and different sociodemographic characteristics compared to the general population, which may limit the generalizability of the study to the broader population of Albania.
- Preliminary data indicate high levels of previous infection, which may limit our ability to evaluate VE in a previously uninfected population.

## **Introduction**

COVID-19 vaccination is critical to reducing the impact of the COVID-19 pandemic. While randomized controlled trials (RCTs) of COVID-19 vaccines have reported high efficacy in preventing SARS-CoV-2 infection,[1] there are a number of reasons why COVID-19 vaccine effectiveness (VE) in real-world settings may be different. In real-world settings, factors such as vaccine storage, transport capacity, and vaccine administration may vary widely.[2,3] In addition, questions about duration of protection, VE against emerging variants of concern, VE against reinfection and VE among individuals with comorbidities and populations with increased exposure risk, like health workers, are best answered through studies conducted in real world conditions. To date, a number of early real-world observational studies have demonstrated moderate to high VE in high-income countries against a range of end-points,[4,5] but limited studies to date[6] have been published on real-world VE in low- and middle-income countries (LMICs).

Albania is an upper middle-income country in Eastern Europe with a population of 2.9 million people.[7] As of January 11, 2022, Albania had reported over 220,000 laboratory-confirmed cases of COVID-19 and over 2,000 COVID-19-related deaths.[8] In December 2020, in accordance with the WHO Strategic Advisory Group of Experts on Immunization (SAGE) and the European Technical Advisory Group, the Albanian National Immunization Technical Advisory Group prioritized health workers (HWs) in Albania as the first target group for COVID-19 vaccine.[9] In December of 2020, about 500,000 doses of the Pfizer BNT162b2 mRNA COVID-19 vaccine were donated by an undisclosed country. The first 11,000 doses



1  
2  
3 arrived in January 2021 and the first doses of COVID-19 vaccine were administered to healthcare workers  
4  
5 in Albania.[10]  
6  
7  
8

9  
10 HWs offer an early opportunity to evaluate COVID-19 VE in a population in which it is critical that an  
11  
12 effective vaccine be deployed. HWs are at high risk of acquiring SARS-CoV-2 infection, and have  
13  
14 experienced high rates of morbidity and mortality during the COVID-19 pandemic.[9,11] HWs also pose a  
15  
16 risk of onward transmission to hospitalized patients, who are often at high risk of serious COVID-19  
17  
18 outcomes.[9]  
19  
20  
21

22 We describe the protocol and the profile of participants of a study of COVID-19 VE among HWs in  
23  
24 Albania, based on a guidance document for VE studies in HWs developed by the WHO Regional Office  
25  
26 for Europe.[12] We also describe the characteristics of study participants at enrollment.  
27  
28  
29

## 30 **Methods and analysis**

### 31 **Objectives**

32  
33 The study is a 12-month prospective longitudinal cohort study, which started in February 2021 and will  
34  
35 continue through May 2022. We aim to evaluate COVID-19 VE in preventing SARS-CoV-2 infection in  
36  
37 HWs in three hospitals in Albania. The primary objective is to measure COVID-19 VE against any  
38  
39 laboratory-confirmed SARS-CoV-2 infection among hospital-based health workers. The secondary  
40  
41 objectives include measuring VE against the following outcomes: symptomatic and asymptomatic  
42  
43 laboratory-confirmed SARS-CoV-2 infection; reinfection; and infection with new SARS-CoV-2 variants;  
44  
45 and estimating VE by age, by various comorbidities, by degree of exposure to COVID-19 patients in the  
46  
47 hospital, by physical distancing practices outside of the hospital, and by length of time since vaccination.  
48  
49  
50  
51  
52

53 The primary and secondary objectives of the study and the knowledge gaps they address are outlined in  
54  
55 Table 1.  
56  
57  
58  
59  
60

### **Study site and participant selection**

This study is being conducted among HWs working in the following three hospitals in Albania: Tirana University Hospital “Mother Theresa” (3200 HWs), Durres Regional hospital (700 HWs), and Fier Regional Hospital (527 HWs). The three hospitals were chosen for the study because they each employ a large number of health workers, and they are centrally located, facilitating sample transport to the national Institute of Public Health (IPH) laboratories, located in the capital, Tirana.

All HWs at least 18 years old in the three hospitals without contraindications to receive COVID-19 vaccine, which included having had a previous allergic reaction to components of the vaccine, were invited to enroll in the study. We defined HWs as any individual working within the hospital system, including physicians, nurses, respiratory therapists, lab technicians, janitorial staff, food workers and administrative staff, regardless of the extent of direct patient interaction. Preference for recruitment was given to those HWs who received their first dose of the Pfizer BNT162b2 mRNA COVID-19 vaccine no more than 4 days prior to the day of enrollment. Participation was voluntary and did not affect HW’s access to receive the COVID-19 vaccine at any time during the study. Covid-19 vaccines are provided to HWs by the hospitals as part of the Albanian vaccine rollout and their access to vaccines is not impacted by the study.

### **Patient and public involvement**

There was no patient involvement in the design of the study.

### **Recruitment and enrollment**

Each participant will be followed for 12 months. After the initial ethical approval, the study was publicized within participating hospitals by word of mouth, flyers, and social media. Study staff approached HWs at various highly trafficked points in the hospital, but ensured not to interfere with any routine hospital work.

1  
2  
3 Study staff described the study in detail, answered all questions, and reviewed the informed consent form  
4 with the potential participant in a private area designated for study use. Participation in the study was  
5 confidential and was not documented in hospital records. Study participation was not a condition of  
6 employment. HWs were invited to participate in the study regardless of their intention to be vaccinated or  
7 of their vaccination status. Health workers who later choose to get vaccinated will remain in the study; their  
8 new vaccination status will be documented and taken into account in the analysis.  
9  
10  
11  
12  
13  
14  
15  
16  
17

### 18 **Study design**

19  
20 After informed consents were obtained, participants were requested to complete an enrollment  
21 questionnaire that included demographic, clinical, and epidemiological information, information about  
22 vaccination history, occupation- and community-related behavior, and recent symptoms. The date of receipt  
23 of the first Covid vaccine, for participants who were vaccinated prior to enrollment, was also collected (see  
24 Appendix 1). Participants also provided a blood sample for baseline serological evaluation to assess for  
25 previous SARS-CoV-2 infection, and a respiratory sample for COVID-19 RT-PCR testing to evaluate for  
26 asymptomatic SARS-CoV-2 infection at the time of enrollment. Participants were not blinded to data  
27 collectors. However, individuals performing the analysis receive only de-identified information.  
28  
29  
30  
31  
32  
33  
34  
35  
36  
37  
38

39 For study participants who did not receive their first COVID-19 vaccine at or prior to enrollment but receive  
40 their first COVID-19 vaccine 14 days or more after enrollment, an additional blood sample is collected,  
41 along with a respiratory sample that will be tested for SARS-CoV-2 by RT-PCR to assess for any  
42 asymptomatic infection which may have occurred between enrollment and the time of vaccination. As part  
43 of the weekly questionnaire, we ask participants if they received their first or second covid-19 vaccine in  
44 the previous week, and whether they experienced any symptoms in the previous week (see symptom  
45 questionnaire (Appendix 2). Timing of questionnaires is outlined in Table 2.  
46  
47  
48  
49  
50  
51  
52  
53  
54  
55

### 56 *Surveillance*

1  
2  
3 In addition to the weekly questionnaire, oral, nasal or nasopharyngeal PCR specimens are collected from  
4 any participant who reports having any of the symptoms, listed in Table 3, based on the Institute of Public  
5 Health, Albania case definition for suspected COVID-19 during the weekly questionnaire.[13]  
6  
7  
8  
9

10  
11 In order to identify test results from SARS-CoV-2 tests performed in locations outside of the study, such  
12 as private clinics, study staff cross-reference participants' study ID numbers with the Albanian national  
13 SARS-CoV-2 testing database within the web-based Information System for Infectious Disease (ISID),  
14 which contains results for all COVID-19 tests performed in the country. For participants who are found to  
15 have a SARS-CoV-2 test result outside of the study, an additional symptom questionnaire is administered  
16 (Appendix 3).  
17  
18  
19  
20  
21  
22  
23  
24  
25

26 Study staff inform HWs about their PCR test results as soon as laboratory testing is complete, whether  
27 positive or negative. Staff also provide basic information to COVID-19-positive participants regarding the  
28 importance of informing known contacts, when to seek additional medical care, quarantining measures and  
29 follow-up with a physician.  
30  
31  
32  
33  
34  
35  
36

37 In addition, all SARS-CoV-2-positive cases are reported automatically by the IPH laboratory to the relevant  
38 hospital infection control team and to the relevant local public health unit via the web-based information  
39 system for infectious diseases, as is standard procedure in Albania.  
40  
41  
42  
43  
44

45 Study staff also contact participants who test positive for SARS-CoV-2 30 days after their positive result  
46 in order to administer a brief follow-up questionnaire about their clinical course (Appendix 4). Participants  
47 who test positive for SARS-CoV-2 do not fill out the weekly questionnaire for 90 days following their  
48 positive test result. In addition to serology at enrollment, blood samples for serology are collected at 3, 6,  
49 9 months, and 12 months after enrollment, in order to identify new SARS-CoV-2 infections during the  
50 study period.  
51  
52  
53  
54  
55  
56  
57  
58  
59  
60

### Study staff

The study team includes staff of the Albanian Institute of Public Health (IPH) with experience conducting research, and staff at each of the hospitals. The Albanian IPH provides programmatic and technical support for operations and data management.

Study staff follow infection control guidelines for every interaction with study participants, study team members and laboratory staff. Staff involvement in the study is not related to whether or not they choose to get vaccinated themselves and does not have an impact on their access to receiving the vaccine.

### Sample size calculations

The sample size was calculated to allow for robust estimates for the primary study objective, based on estimated vaccination coverage among health workers in Albania, estimated VE, the estimated incidence of SARS-CoV-2 infection over the follow-up time in the unvaccinated study population, and the desired precision.

To meet the desired precision of 5% significance level and a power of 80%, and using the assumptions of a VE of 70% with an incidence of SARS-CoV-2 of 0.05 over the 12-month period and vaccine coverage among participants of 80%, and accounting for a drop-out rate of roughly 10%,[14] we estimated a target population of 1500 HWs.

### Data management and ensuring data confidentiality

Data collection and site-level management are conducted using REDCap (Research Electronic Data Capture, Vanderbilt University, Nashville, TN, USA), a secure web application for building and managing online surveys and databases.[15] Within REDCap, a specific project containing all data collection

1  
2  
3 instruments including participant consent forms, enrollment questionnaires, specimen collection, laboratory  
4 results, weekly questionnaires and follow up of symptomatic and COVID-19 positive cases are customized  
5 for this study and organized to cover a period of 52 weeks for each participant. Any paper documentation  
6 is stored in a secured space and data is uploaded through a secure web connection.  
7  
8  
9  
10

11  
12  
13 Identifying information is maintained only by the responsible person(s) in each study site in accordance  
14 with Ministry of Health and Social Protection requirements. Security measures including password  
15 protection and encrypted files are implemented for all study data.  
16  
17  
18  
19  
20

## 21 22 **Laboratory procedures**

### 23 *Sample collection*

24  
25 All biological sampling for SARS-CoV-2 RNA are conducted following IPH guidelines on the proper  
26 handling and processing of potentially infectious biological materials, based on the latest recommendations  
27 from WHO.[16] Dedicated medical staff collect nasal swabs from participants at enrollment and from  
28 symptomatic participants during the course of the study. Specimens are transported to the laboratory as  
29 soon as possible after collection. If a respiratory specimen is not likely to reach the laboratory and be tested  
30 within 96 hours, it is stored, at  $-70^{\circ}\text{C}$ , and shipped on ice thermo-boxes. Venipuncture for sera is conducted  
31 by hospital-based phlebotomists. Serum specimens are separated from whole blood and stored and shipped  
32 at  $4^{\circ}\text{C}$ , or the sera is spun and frozen at  $-20^{\circ}\text{C}$  and shipped directly to the national reference lab at IPH,  
33 where they are stored at  $-20^{\circ}\text{C}$  or lower until tested.  
34  
35  
36  
37  
38  
39  
40  
41  
42  
43  
44  
45

### 46 *Testing*

47  
48 All respiratory samples are tested for SARS-CoV-2 by RT-PCR. The RT-PCR testing for SARS-CoV-2 is  
49 conducted in the IPH laboratory in Tirana, based on methods implemented and validated in the IPH lab  
50 targeting the three major gene targets (N, S and ORF1ab). Testing is conducted with TaqPath COVID-19  
51 CE-IVD kits developed by Thermo Fischer.[17] RT-PCR- positive specimens collected from participants  
52  
53  
54  
55  
56  
57  
58  
59  
60

1  
2  
3 will be further characterized by genetic sequencing at a regional reference laboratory in Europe, following  
4 WHO guidelines.[18] in order to understand whether changes in VE could be due in part to virus mutations  
5 or specific variant viruses.  
6  
7  
8  
9

10  
11 Enrollment serology samples were tested using the Wantai antibody ELISA for qualitative detection of total  
12 IgG and IgM antibodies to the SARS-Co-V-2 Spike protein.[19] Cut-offs were determined according to  
13 manufacturer instructions.[19] Serology samples from enrollment will also be tested for anti-nucleocapsid  
14 antibodies. Quarterly serological samples will be tested by anti-nucleocapsid protein antibody tests in order  
15 to identify SARS-CoV-2 infection among vaccinated and unvaccinated participants, and by quantitative  
16 anti-spike protein antibody tests in order to identify potential correlates of protection. Additional serological  
17 studies may also be performed on a subset of samples.  
18  
19  
20  
21  
22  
23  
24  
25  
26  
27

## 28 **Analysis plan and statistical considerations**

### 29 *Vaccine effectiveness analysis*

30  
31 Study participants will be described in terms of total number of eligible HWs, and number and proportion  
32 of total who refused participation. Vaccination status will be considered a time-varying exposure  
33 (vaccination status of individuals may change over time from unvaccinated to vaccinated; one to two doses).  
34  
35 An individual is considered vaccinated with the first dose 14 days after receiving the first vaccine and fully  
36 vaccinated 14 days after receiving the second dose of the vaccine. Sensitivity analyses may be performed  
37 to evaluate the effectiveness of the vaccine after different intervals following vaccination. If participants  
38 receive additional doses of vaccine, these doses will be documented within the study and considered in the  
39 analysis.  
40  
41  
42  
43  
44  
45  
46  
47  
48  
49  
50

51 Hazard ratios comparing vaccinated and unvaccinated will be estimated using piece-wise exponential  
52 survival models. Poisson regression will be used to model these,[20] with the log of person time in the  
53  
54  
55  
56  
57  
58  
59  
60

1  
2  
3 offset, and time split into intervals allowing to estimate baseline hazards of SARS-CoV-2. Individual-level  
4  
5 variability will be explored by adding a subject-specific random effect.  
6  
7

8  
9 VE will be estimated as  $(1 - \text{hazard ratio [HR]})$ . Follow-up will be from enrollment to the earliest of  
10  
11 outcome or study exit. Primary VE analysis will be for the hazard ratio for events in the period 14 days  
12  
13 from first dose of vaccine onwards, and from the period of 14 days from second dose of vaccine onwards,  
14  
15 both compared to events among unvaccinated. Analyses will be carried out in the overall cohort and  
16  
17 separately among participants with and without previous infection.  
18  
19

20  
21  
22 Both unadjusted and adjusted estimates of VE will be presented. We will adjust the multivariable regression  
23  
24 model using a priori fixed covariates (hospital, cohort, age, sex and comorbidities) and potential  
25  
26 confounders, such as occupation, patient-facing role, performance of aerosol-generating procedures and use  
27  
28 of public transport. Bivariable and stratified analyses using participant characteristics will be carried out to  
29  
30 better understand potential confounders and effect modifiers. Effect modifiers will be assessed using  
31  
32 interaction terms. Factors other than statistical significance (magnitude of measure of effect, biological  
33  
34 plausibility) will be used to assess interactions for relevance. Confounding factors will be assessed by  
35  
36 comparing crude and adjusted estimates for each baseline characteristic. We will perform a backward  
37  
38 selection procedure to identify other potential confounders. The multivariable regression model will include  
39  
40 those variables that change the VE estimates by 5% absolute.  
41  
42  
43  
44

45 If sample size permits, additional secondary estimates for VE will be calculated by the following  
46  
47 parameters:  
48

- 49 ● partially vs. fully vaccinated;
- 50
- 51 ● type of HW and wards;
- 52
- 53 ● age groups;
- 54
- 55 ● sex;
- 56
- 57
- 58
- 59
- 60



- presence or absence of high-risk conditions for severe illness (see appendix 1);[11]
- study week or weeks of the year;
- time since vaccination
- variants of concern

### **Baseline data**

The study began recruitment on Feb 19, 2021, and as of May 1, 2021, 1504 HWs had been enrolled, including 942 (63%) from Tirana University Hospital, 300 (20%) from Durres Hospital and 262 (17%) from Fier Hospital. Participants' demographic information and the results of enrollment serology and PCR testing are described in Table 4. Overall, the median age was 44 years (range: 22, 71), 1181 (78%) of participants were female, and 385 (26%) reported having at least one co-morbidity. In all, 1434 of 1504 (95%) reported having direct patient contact. 536 (36%) reported having tested positive for COVID-19 prior to enrollment (418 (77%) by PCR, 54 (10%) by serology, 47 (9%) by rapid test and 46 (7%) were unsure of the testing method). At enrollment, 18 (1%) participants were positive for SARS-CoV-2 by RT-PCR and 1085 (72%) participants were positive for SARS-CoV-2 anti-spike protein antibodies based on serology testing. Of the participants who tested positive by RT-PCR at enrollment, 7 out of 18 reported at least 1 symptom. Overall, 842 (56%) of study participants had received one dose of the Pfizer BNT162b2 mRNA COVID-19 vaccine at enrollment. All vaccinated participants received their first vaccine dose no more than 4 days prior to enrollment. No participant had received two doses of vaccine prior to enrollment, and no participant received a vaccine other than the Pfizer BNT162b2 mRNA COVID-19 vaccine prior to enrollment.

### **Ethics and dissemination**

The study protocol and procedures were reviewed and approved by the WHO Ethical Review Board, reference number CERC.0097A as well as the IPH institutional review board, reference number 156. All

1  
2  
3 data is stored in REDCap and stakeholders have user-specific defined access. All participants have provided  
4  
5 written informed consent.  
6  
7  
8

9  
10 This study has been registered with ClinicalTrials.gov (Identifier NCT04811391). A manuscript with the  
11  
12 results of the primary study will be published in a peer-reviewed journal.  
13  
14

## 15 16 **Discussion**

17  
18 In our prospective study of COVID-19 VE in HWs in Albania, we aim to answer critical questions about  
19  
20 the real-world effectiveness of COVID-19 vaccines among HWs in an upper middle-income country. While  
21  
22 preliminary reports of real world VE for mRNA vaccines have shown encouragingly high VE of 86-90%  
23  
24 against SARS CoV-2 infection, these studies were conducted in high-income countries, such as UK, the  
25  
26 US and Israel.[4,5,21] Effectiveness may vary in lower-resource settings, in part due to challenges such as  
27  
28 vaccine transport, storage, administration and associated technical skill.[3] Low- and middle-income  
29  
30 countries could also face varying levels of virus transmission, in part due to lower vaccine coverage, and  
31  
32 different circulating viruses. As of January 11, over 460,000 people (41% of the population) in Albania had  
33  
34 received at least one dose of COVID-19 vaccine,[22] much lower than the one-dose coverage rates in the  
35  
36 United Kingdom (76%), the United States of America (73%) and Israel (72%) by the same date.[22]  
37  
38 Understanding VE in a middle-income country such as Albania provides important information regarding  
39  
40 allocation and effective vaccine distribution in similar contexts. This understanding has a critical impact on  
41  
42 local funding of vaccines as well as building trust in local vaccine rollouts.[23]  
43  
44  
45

46  
47 Our protocol was adapted from the WHO/Europe guidance document for cohort studies to measure  
48  
49 COVID-19 VE in HWs.[12] Similar studies based on the same guidance document are being conducted in  
50  
51 other countries within the Eastern European region, and will provide an opportunity to compare country-  
52  
53 level VE and to estimate VE using aggregated data. Similar studies evaluating VE in HWs have been  
54  
55 conducted in the US by the HEROES/RECOVER network as well.[21]  
56  
57  
58  
59  
60

1  
2  
3  
4  
5 The enrollment profile of participants in our study offers unique challenges and opportunities. Over 70%  
6 of our study participants were seropositive for SARS-CoV-2 anti-spike antibodies on enrollment, a figure  
7 that is higher than the 48% seropositivity reported from a seroprevalence survey of the general population  
8 of Tirana, Albania during December 2020,[24] which was nearly 2 months prior to the start of our study.  
9  
10 Nearly all (98%) vaccinated participants had serology drawn within 4 days of their first vaccination, making  
11 it very unlikely that this seropositivity reflects a vaccine-induced antibody response. While false positives  
12 are a consideration from the Wantai SARS-CoV-2 Ab Elisa due to cross-reactivity from pre-existing  
13 antibodies, the test has been found to have sensitivity of 99%.[25]  
14  
15  
16  
17  
18  
19  
20  
21  
22  
23

24 While previously infected study participants are likely to be at reduced risk for reinfection for at least 5-6  
25 months,[26] the study population represents real-world conditions, and future recommendations about  
26 vaccine use will need to be made taking into account the fact that many populations have high seroprevalence.  
27 We will test quarterly serologies using an anti-nucleocapsid antibody test, which will allow us to measure  
28 natural infection among both vaccinated and unvaccinated participants. Because this is a 15-month study,  
29 we hope to be able to draw conclusions about duration of VE, duration of natural immunity, with or without  
30 vaccine, and VE against Variants of Concern that may appear and could escape existing vaccines and/or  
31 natural immunity, as has recently been demonstrated with the delta and omicron variants.[27,28,29]  
32  
33  
34  
35  
36  
37  
38  
39  
40  
41  
42

43 A strength of our study is the novelty of conducting a rigorous, prospective VE study using standardized  
44 methodology in an upper middle-income country.[12] Another strength is the use of a very sensitive  
45 definition for suspected symptomatic cases of COVID-19, which will ensure that even mildly symptomatic  
46 cases will be captured in our analysis. Additionally, testing serology samples using anti-nucleocapsid  
47 antibody testing will allow us to identify asymptomatic infections or symptomatic infections not captured  
48 by PCR screening and distinguish vaccine-induced immune response from infection-induced immunity. By  
49 capturing serology and nasal swabs at enrollment, prior infection will be incorporated into our analysis. In  
50  
51  
52  
53  
54  
55  
56  
57  
58  
59  
60

1  
2  
3 addition, the use of the COVID-19 Albanian National Database will allow for close monitoring of Covid-  
4  
5 19 tests, include those performed by study participants outside of the study.  
6  
7  
8  
9

10 Our study has a number of limitations. Our study is subject to selection bias; the study was voluntary and  
11  
12 although we tried to recruit HWs broadly in the three hospitals, it is possible that the HWs in our study are  
13  
14 not representative of all HWs in the three hospitals or of the general population in Albania.  
15  
16  
17

18 In addition, our study includes HWs, who are likely to have different rates of exposure to COVID-19 and  
19  
20 different sociodemographic characteristics compared to the general population. As a result, study results  
21  
22 are not be generalizable to the broader population of Albania. Because of the high levels of previous  
23  
24 infection, we may not be adequately powered to show VE in a previously uninfected population. However,  
25  
26 the added value of vaccine in preventing re-infection in previously infected individuals is an important gap  
27  
28 in global evidence; our study may allow us to answer this question. Additionally, the SARS-CoV-2  
29  
30 pandemic continues to evolve, resulting in multiple variants of concern, such as the delta and omicron  
31  
32 variants, which have been associated with vaccine breakthrough infections, and meaningfully reduced  
33  
34 vaccine effectiveness for mild and, to a lesser extent severe, illness.[29] It is unclear to what extent natural  
35  
36 infection will protect from future VoCs, even with the addition of partial or full vaccination, but a similar  
37  
38 pattern may emerge. Furthermore, given the potentially low number of cases among previously infected  
39  
40 individuals,[26] we may be inadequately powered to evaluate secondary VE objectives such as VE by age  
41  
42 and co-morbidity or by variant infection.  
43  
44  
45  
46  
47

48 Understanding the VE of the COVID-19 vaccine in HWs in Albania will provide critical information about  
49  
50 the performance of COVID-19 vaccines in an upper middle-income country over the course a 12-month  
51  
52 period. Our findings should inform decisions about vaccine use in Albania and could be helpful for other  
53  
54  
55  
56  
57  
58  
59  
60

1  
2  
3 countries in the region and around the world, which will likely be facing very similar questions about  
4  
5 vaccine policy.  
6  
7

8 **Data Availability Statement:** No additional data available.  
9

10 **Disclaimer:** The authors alone are responsible for the views expressed in this article and they do not  
11 necessarily represent the views, decisions or policies of the institutions with which they are affiliated.  
12

13 **Contributors:** All authors made substantial contributions to the conception or design of the work, as well  
14 as the acquisition, analysis and interpretation of data for the work. Shela Sridhar, Iris Hatibi, Jonilda Sulo,  
15 Esther Kissling, Kathryn Lafond, Mark Katz, and Slivia Bino were involved in the conceptualization,  
16 analysis and interpretation of the work as well as primary drafting of this manuscript. Albana Fico, Pernille  
17 Jorgensen, Diogo Lemos, Marta Valenciano Richard Pebody and Rawi Ibrahim were involved in the  
18 conceptualization of this work and final drafting of this manuscript. Iria Preza, Rovena Daja, Julia Rubin-  
19 Smith, Alexis Schmid, and Adela Vasili were involved in the conceptualization, acquisition, analysis and  
20 interpretation of this work as well as the final drafting of this manuscript. All authors were involved in  
21 drafting and revising the document for intellectual content and provided final approval of the version to be  
22 published. All authors are in agreement to be accountable for all aspects of this work in regards to accuracy  
23 and integrity.  
24  
25  
26  
27  
28  
29  
30  
31  
32  
33  
34  
35

36 **Competing interests:** There are no competing interests to report.  
37

38 **Funding:** The study is funded by the WHO Regional Office for Europe the United States Centers for  
39 Disease Control and Prevention (US CDC) and conducted by the Institute of Public Health (IPH) in Albania.  
40  
41  
42  
43 There is no associated award/grant number.  
44  
45  
46

#### 47 **References**

- 48 1. Dagan N, Barda N, Kepten E, et al. BNT162b2 mRNA Covid-19 Vaccine in a Nationwide Mass Vaccination  
49 Setting. *New England Journal of Medicine*. 2021;384(15). doi:10.1056/NEJMoa2101765
- 50 2. Patel MM, Jackson ML, Ferdinands J. Postlicensure Evaluation of COVID-19 Vaccines. *JAMA*. 2020;324(19).  
51 doi:10.1001/jama.2020.19328
- 52 3. Grenham A, Villafana T. Vaccine development and trials in low and lower-middle income countries: Key issues,  
53 advances and future opportunities. *Human Vaccines & Immunotherapeutics*. 2017;13(9).  
54 doi:10.1080/21645515.2017.1356495  
55  
56  
57  
58  
59  
60

4. Hall VJ, Foulkes S, Charlett A, et al. SARS-CoV-2 infection rates of antibody-positive compared with antibody-negative health-care workers in England: a large, multicentre, prospective cohort study (SIREN). *The Lancet*. 2021;397(10283). doi:10.1016/S0140-6736(21)00675-9
5. Benenson S, Oster Y, Cohen MJ, Nir-Paz R. BNT162b2 mRNA Covid-19 Vaccine Effectiveness among Health Care Workers. *New England Journal of Medicine*. 2021;384(18). doi:10.1056/NEJMc2101951
6. Jara A, Undurraga EA, González C, et al. Effectiveness of an Inactivated SARS-CoV-2 Vaccine in Chile. *New England Journal of Medicine*. Published online July 7, 2021. doi:10.1056/NEJMoa2107715
7. Institute of Statistics I of PH and I. *Albania Demographic and Health Survey 2017-18*; 2018.
8. <https://graphics.reuters.com/world-coronavirus-tracker-and-maps/countries-and-territories/albania/>. Albania: The Latest Coronavirus Counts, Charts and Maps.
9. SAGE Working Group on COVID-19 vaccines. *WHO SAGE ROADMAP FOR PRIORITIZING USES OF COVID-19 VACCINES IN THE CONTEXT OF LIMITED SUPPLY*.
10. Semini L. Albania carries out 1st vaccinations with donated doses. *ABC News*. January 11, 2021.
11. Gouda D, Singh PM, Gouda P, Goudra B. An Overview of Health Care Worker Reported Deaths During the COVID-19 Pandemic. *The Journal of the American Board of Family Medicine*. 2021;34(Supplement). doi:10.3122/jabfm.2021.S1.200248
12. World Health Organization. Regional Office for Europe. *Cohort Study to Measure COVID-19 Vaccine Effectiveness among Health Workers in the WHO European Region: Guidance Document*; 2021.
13. Bino S. *Albanian Case Definition of COVID-19*; 2020.
14. *Journal of Biomedical Informatics*. 2009;42(2). doi:10.1016/j.jbi.2008.08.010
15. Harris PA, Taylor R, Thielke R, Payne J, Gonzalez N, Conde JG. Research electronic data capture (REDCap)—A metadata-driven methodology and workflow process for providing translational research informatics support. <https://www.who.int/csr/resources/publications/biosafety/Biosafety7.pdf>. *Laboratory Biosafety Manual*. – 3rd Ed.; 2004.
16. TaqPath COVID-19 Multiplex Diagnostic Solution- US. <https://www.thermofisher.com/us/en/home/clinical/clinical-genomics/pathogen-detection-solutions/covid-19-sars-cov-2/multiplex.html>.
17. *Genomic Sequencing of SARS-CoV-2: A Guide to Implementation for Maximum Impact on Public Health*; 2021.
18. [fda.gov/media/140929/download](https://www.fda.gov/media/140929/download). Wantai SARS-Co-V-2 Ab Elisa [package insert]. U.S. food and Drug Administration website.
19. Holford TR. The Analysis of Rates and of Survivorship Using Log-Linear Models. *Biometrics*. 1980;36(2). doi:10.2307/2529982
20. Thompson MG, Burgess JL, Naleway AL, et al. Interim Estimates of Vaccine Effectiveness of BNT162b2 and mRNA-1273 COVID-19 Vaccines in Preventing SARS-CoV-2 Infection Among Health Care Personnel, First Responders, and Other Essential and Frontline Workers — Eight U.S. Locations, December 2020–March 2021. *MMWR Morbidity and Mortality Weekly Report*. 2021;70(13). doi:10.15585/mmwr.mm7013e3
21. Our World in Data. Coronavirus (COVID-19) Vaccinations- Statistics and Research. <https://ourworldindata.org/covid-vaccinations>.
22. Wouters OJ, Shadlen KC, Salcher-Konrad M, et al. Challenges in ensuring global access to COVID-19 vaccines: production, affordability, allocation, and deployment. *The Lancet*. 2021;397(10278). doi:10.1016/S0140-6736(21)00306-8
23. Sulcebe G, Ylli A, Cenko F, Kurti-Prifti. Rapid Increase of SARS-CoV-2 Seroprevalence during the 2020 Pandemic Year in the Population of the City of Tirana, Albania. *medRxiv*. Published online February 20, 2021.
24. GeurtsvanKessel CH, Okba NMA, Igloi Z, et al. An evaluation of COVID-19 serological assays informs future diagnostics and exposure assessment. *Nature Communications*. 2020;11(1). doi:10.1038/s41467-020-17317-y
25. Hansen CH, Michlmayr D, Gubbels SM, Mølbak K, Ethelberg S. Assessment of protection against reinfection with SARS-CoV-2 among 4 million PCR-tested individuals in Denmark in 2020: a population-level observational study. *The Lancet*. 2021;397(10280). doi:10.1016/S0140-6736(21)00575-4
26. Bernal JL, Gower C, Gallagher E, et al. Effectiveness of COVID-19 vaccines against the B.1.617.2 variant. <https://khub.net/documents/135939561/430986542/Effectiveness+of+COVID-19+vaccines+against+the+B16172+variant.pdf/204c11a4-e02e-11f2-db19-b3664107ac42>. Published online 2021.
27. Lopez Bernal J, Andrews N, Gower C, et al. Effectiveness of Covid-19 Vaccines against the B.1.617.2 (Delta) Variant. *New England Journal of Medicine*. Published online July 21, 2021. doi:10.1056/NEJMoa2108891
28. Collie, Shirley, et al. “Effectiveness of BNT162B2 Vaccine against Omicron Variant in South Africa.” *New England Journal of Medicine*, 2021, <https://doi.org/10.1056/nejmc2119270>.

**Table 1. Knowledge gaps of Cohort Study to Measure COVID-19 Vaccine Effectiveness among Health Workers in Albania (COVE-AL), and study features intended to address them**

| Knowledge Gap                                                                                                                                                     | Study Feature                                                                                                                                                                                                                                                                                       |
|-------------------------------------------------------------------------------------------------------------------------------------------------------------------|-----------------------------------------------------------------------------------------------------------------------------------------------------------------------------------------------------------------------------------------------------------------------------------------------------|
| <i>To measure the effectiveness of the COVID-19 vaccine against symptomatic and asymptomatic, laboratory-confirmed SARS CoV-2 infection among health workers</i>  |                                                                                                                                                                                                                                                                                                     |
| To date, studies on real-world COVID-19 VE have been conducted in high-income settings. Limited data exists on real-world COVID-19 VE in middle income countries. | This study will be conducted in Albania, an upper middle-income country in Eastern Europe.                                                                                                                                                                                                          |
| The impact of the COVID-19 vaccine on the prevention of asymptomatic disease, an important driver of the COVID-19 pandemic, remains unclear.                      | Participants with asymptomatic disease will be identified through quarterly serology testing, combined with weekly symptom screening.                                                                                                                                                               |
| VE may vary as new Variants of Concern COVID-19 circulate.                                                                                                        | The study will be conducted over the course of a year, so new variants will likely be captured within the circulating population. Additionally, we will perform genetic sequencing on all positive samples to identify the circulating variants over the course of the study.                       |
| <i>Does Vaccine effectiveness vary by new strains of SARS-CoV-2?</i>                                                                                              |                                                                                                                                                                                                                                                                                                     |
| The literature is very sparse regarding the effects of previous infection and re-infection with SARS CoV-2 variants.                                              | Sequencing of SARS-CoV-2 positive RT-PCRs will be completed.                                                                                                                                                                                                                                        |
| <i>To measure COVID-19 Vaccine effectiveness by Age</i>                                                                                                           |                                                                                                                                                                                                                                                                                                     |
| Limited data exists regarding VE across varying age groups.                                                                                                       | A cross-section of hospital workers will be collected and final analysis will be stratified using age.                                                                                                                                                                                              |
| <i>Duration of COVID-19 Vaccine Protection against infection</i>                                                                                                  |                                                                                                                                                                                                                                                                                                     |
| There is limited data on the duration of VE.                                                                                                                      | This is a 12-month study that will evaluate VE against PCR-confirmed symptomatic infection and quarterly seroconversion for the duration of the 12 months. Serology samples will be collected at 0, 3, 6, 9, 12 months testing for nucleocapsid protein presence to evaluate for natural infection. |
| <i>To Measure the effectiveness the Covid-19 Vaccine in health workers previously infected with COVID-19.</i>                                                     |                                                                                                                                                                                                                                                                                                     |
| There is limited data on how long previous infection with disease confers protection against re-infection of SARS CoV-2.                                          | We will evaluate the incidence of SARS-CoV-2 re-infection among previously infected health care workers comparing vaccinated to unvaccinated individuals.                                                                                                                                           |
| The utility of COVID-19 vaccine to prevent re-infection in individuals with previous SARS CoV-2 is not well understood.                                           | During the analysis, study participants will be stratified based previous infection prior to vaccination.                                                                                                                                                                                           |
| <i>VE and duration of VE of one dose of vaccine against infection</i>                                                                                             |                                                                                                                                                                                                                                                                                                     |
| There is sparse data regarding incidence of SARS CoV-2 infection after only one dose of the Covid-19 vaccines.                                                    | The study will measure VE, through the use of serology and PCR, in partially and fully vaccinated individuals.                                                                                                                                                                                      |

*Variation in VE by degree of exposure to Covid 19 patients in the hospital setting and physical distancing practices outside the hospital*

|                                                                                                                                                                                                 |                                                                                                                                                                                                     |
|-------------------------------------------------------------------------------------------------------------------------------------------------------------------------------------------------|-----------------------------------------------------------------------------------------------------------------------------------------------------------------------------------------------------|
| In healthcare workers, a population known to be at high risk for COVID-19, little is known about the impact of activities outside of the workplace is on the incidence of SARS CoV-2 infection. | We will collect information about in-hospital exposure to COVID-19 patients and hospital ward of work for each participant and stratify our analysis accordingly in order to address this question. |
|-------------------------------------------------------------------------------------------------------------------------------------------------------------------------------------------------|-----------------------------------------------------------------------------------------------------------------------------------------------------------------------------------------------------|

**Table 2: Timing of questionnaires and specimen collection, Cohort Study to Measure COVID-19 Vaccine Effectiveness among Health Workers in Albania (COVE-AL)**

| Timing in the study                           | Baseline | Weekly | For symptomatic participants | 30 days after a participant tests positive for SARS-CoV-2 | Every 3 months |
|-----------------------------------------------|----------|--------|------------------------------|-----------------------------------------------------------|----------------|
| Baseline questionnaire T1                     | X        |        |                              |                                                           |                |
| Weekly Symptom questionnaire                  |          | X      |                              |                                                           |                |
| Ad hoc symptom questionnaire                  |          |        | X                            |                                                           |                |
| 30-day follow up of SARS-CoV-2-positive cases |          |        | X                            | X                                                         |                |
| Respiratory sample for PCR testing            | X        |        | X                            |                                                           |                |
| Serology                                      | X        |        |                              |                                                           | X              |

**Table 3: Case Definition for Suspected symptomatic Covid-19 illness, Cohort Study to Measure COVID-19 Vaccine Effectiveness among Health Workers in Albania (COVE-AL)**

- A participant with any of the following symptoms in the last 7 days is considered a suspected Covid-19 case and will have a respiratory swab collected:

- |                    |                       |                         |
|--------------------|-----------------------|-------------------------|
| • Fever            | • Sore throat         | • Diarrhea              |
| • Cough            | • Runny nose          | • Altered Mental Status |
| • General Weakness | • Shortness of breath | • Loss of taste         |
| • Fatigue          | • Lack of appetite    | • Loss of smell         |
| • Headache         | • Nausea              |                         |
| • Muscle Aches     | • Vomiting            |                         |



| Characteristics                                                                          | n (%)     |
|------------------------------------------------------------------------------------------|-----------|
| <b>Hospital</b>                                                                          |           |
| Tirana University Hospital                                                               | 942 (63)  |
| Durres Hospital                                                                          | 300 (20)  |
| Fier Hospital                                                                            | 262 (17)  |
| <b>Gender</b>                                                                            |           |
| Male                                                                                     | 323 (21)  |
| Female                                                                                   | 1181 (79) |
| <b>If female, pregnant</b>                                                               |           |
| Yes                                                                                      | 32 (2)    |
| No                                                                                       | 1149 (77) |
| <b>If female, breastfeeding</b>                                                          |           |
| Yes                                                                                      | 18 (1)    |
| No                                                                                       | 1163 (77) |
| <b>Age Group</b>                                                                         |           |
| 20-30                                                                                    | 269 (18)  |
| 31-40                                                                                    | 382 (25)  |
| 41-50                                                                                    | 373 (25)  |
| 51-60                                                                                    | 424 (28)  |
| Over 60                                                                                  | 56 (4)    |
| <b>Pre-existing Medical Conditions</b>                                                   |           |
| High blood pressure/Hypertension                                                         | 121 (8)   |
| Obesity                                                                                  | 80 (5)    |
| Diabetes                                                                                 | 41 (3)    |
| Chronic Lung Disease (such as asthma, COPD, bronchitis)                                  | 31(2)     |
| Chronic Heart Disease, excluding high blood pressure                                     | 29 (2)    |
| Autoimmune Disorder                                                                      | 29 (2)    |
| Cancer                                                                                   | 21 (1)    |
| Neurological Disease: including cerebrovascular disease, epilepsy and multiple sclerosis | 13 (0.8)  |
| Chronic Liver Disease (such as cirrhosis, hepatitis, fatty liver disease)                | 12 (0.8)  |
| Chronic Kidney Disease                                                                   | 7 (0.5)   |
| Immunocompromised, including solid organ transplant and HIV                              | 1 (0.06)  |

**Table 4: Sociodemographic and clinical Characteristics, vaccination status, and SARS-CoV-2 serological status of Participants at Enrollment, Cohort Study to Measure COVID-19 Vaccine Effectiveness among Health Workers in Albania (COVE-AL)**

|                                                                              |           |
|------------------------------------------------------------------------------|-----------|
|                                                                              |           |
| <b>Smoking</b>                                                               |           |
| Current or previous smoker                                                   | 273 (14)  |
| Never smoked                                                                 | 1231 (86) |
| <b>Occupation</b>                                                            |           |
| Nurse                                                                        | 691 (46)  |
| Medical Doctor                                                               | 305 (20)  |
| Midwife                                                                      | 30 (2)    |
| Laboratory Technician                                                        | 42 (3)    |
| Biologist                                                                    | 0 (0)     |
| Pharmacist                                                                   | 8 (0.5)   |
| Janitorial Staff                                                             | 190 (13)  |
| Food Worker                                                                  | 5 (0.3)   |
| Social Worker                                                                | 6 (0.3)   |
| Radiology Technician                                                         | 22 (1)    |
| Other*                                                                       | 214 (14)  |
| <b>Clinical Health Worker (Hands on medical care)</b>                        |           |
| Yes                                                                          | 908 (60)  |
| No                                                                           | 596 (40)  |
| <b>Received a positive laboratory test for SARS CoV-2 since January 2020</b> |           |
| Yes                                                                          | 536 (36)  |
| No                                                                           | 968 (64)  |
| <b>If yes</b>                                                                |           |
| PCR                                                                          | 418 (28)  |
| Rapid test                                                                   | 47 (9)    |
| Serology                                                                     | 54 (10)   |
| Don't know                                                                   | 36 (7)    |
| <b>Received at least 1 dose of the COVID-19 Vaccine</b>                      |           |
| Yes                                                                          | 842 (56)  |
| No                                                                           | 662 (44)  |
| <b>Brand of vaccine if yes</b>                                               |           |
| Pfizer                                                                       | 842 (56)  |
| <b>Enrollment PCR Results</b>                                                |           |
| Positive                                                                     | 18 (1)    |
| Negative                                                                     | 1486 (99) |
| <b>Enrollment Serology Results</b>                                           |           |
| Positive                                                                     | 1085 (72) |
| Negative                                                                     | 414 (28)  |
| Cut-off (borderline)                                                         | 5 (0.3)   |

\*Other includes: accountant (10), administrative staff (55), archivist (1), scientist (4), couriers (5), drivers (20), economists (27), Information Technologists (2), Lawyer (5), specialists (29), police officer (5), psychologists (6), physiotherapists (5).

## Enrollment Questionnaire

### **INSTRUCTIONS:**

This survey will take about 5-10 minutes to complete. If you have any questions, please contact [XXXXXX] at [-XXXXXXXXXX] or email XXXXXXX.

Thank you again for your time.

### **A. Demographics, SARS-CoV-2 history and vaccination history**

A1. What is your age?

A2. Are you male or female?

A2a. If you are female:

Are you pregnant?: (If yes, specify trimester)

Are you Breastfeeding?:

A3. What is your height in cm?

A4. What is your weight in kg?

A5. Have you ever been diagnosed with any of the following?

- Cancer
- Chronic Heart Disease, excluding high blood pressure
- High blood pressure/Hypertension
- Chronic Kidney Disease
- Chronic Liver Disease (such as cirrhosis, hepatitis, fatty liver disease)
- Chronic Lung Disease (such as asthma, COPD, bronchitis, etc...)
- Diabetes
- Immunocompromised, including solid organ transplant and HIV
- Neurological Disease, including cerebrovascular disease, epilepsy, multiple sclerosis, etc...
- Obesity
- Autoimmune disorder

A6. Do you currently smoke?

- Yes
- No

1  
2  
3 *A6a: If no, have you smoked previously?*

4  Yes

5  No

6  
7  
8  
9 A7. How many people (not including yourself) do you live with?

10  0

11  1

12  2

13  3

14  4

15  5

16  6 or more

17  
18  
19  
20  
21  
22 A8. Since January 2020, have you ever received a positive laboratory test for SARS-CoV-2, the  
23 virus that causes COVID-19?

24  
25  Yes

26  No

27  
28  
29  
30 A8a. If yes, when was the positive test (date), and what kind of test was performed (PCR or rapid  
31 test or serology)

32  PCR (nasal swab)

33  Rapid Test (nasal swab)

34  Serology Test (a blood test)

35  Don't remember

36  
37  
38  
39 Date of Test \_\_\_\_\_

40  
41 (Allow option for multiple positive test results)

42  
43  
44 **COVID 19 Vaccination Questions**

45 A9. When the COVID -19 vaccine becomes available, what are the chances that you will choose  
46 to receive a COVID-19 vaccination if you are offered one?

47  Almost Zero Chance

48  Very Small Chance

49  Small

50  Moderate

51  Large

52  Very Large Chance

Almost Certain

I have already received a COVID-19 vaccine: Date: \_\_\_\_\_

| <b>Vaccination history</b>                                                           |                                                                                                                                                                                                                                           |
|--------------------------------------------------------------------------------------|-------------------------------------------------------------------------------------------------------------------------------------------------------------------------------------------------------------------------------------------|
| <b>COVID vaccine</b>                                                                 |                                                                                                                                                                                                                                           |
| 1. Do you have a contraindication for the COVID-19 vaccine?                          | <input type="checkbox"/> Yes <input type="checkbox"/> No <input type="checkbox"/> Unknown                                                                                                                                                 |
| 2. Have you received the first dose of any COVID-19 vaccine?                         | <input type="checkbox"/> Yes <input type="checkbox"/> No <input type="checkbox"/> Unknown                                                                                                                                                 |
| 3. If yes, what was the date of the first dose? (dd/mm/yyyy)                         | ___/___/___                                                                                                                                                                                                                               |
| 4. Which vaccine did you receive? (product name)                                     |                                                                                                                                                                                                                                           |
| 5. Mode of vaccine ascertainment (to be the verified by study staff)                 | <input type="checkbox"/> = vaccination card<br><input type="checkbox"/> = vaccination registry<br><input type="checkbox"/> = self-report<br><input type="checkbox"/> = other (specify _____)<br><input type="checkbox"/> = not documented |
| 6. What was the Batch of the vaccine received?                                       | Please provide the match number from the above documents or state <input type="checkbox"/> Unknown                                                                                                                                        |
| 7. Have you received a second dose of the COVID-19 vaccine?                          | <input type="checkbox"/> Yes <input type="checkbox"/> No <input type="checkbox"/> Unknown                                                                                                                                                 |
| 8. If yes, what day did you receive the second dose (dd/mm/yyyy)                     | ___/___/___                                                                                                                                                                                                                               |
| 9. Which kind of vaccine did you receive for the second dose (product name)          |                                                                                                                                                                                                                                           |
| 10. What was the Batch number of the second dose vaccine you received?               | Please provide the match number from the ascertainment documents or state <input type="checkbox"/> Unknown                                                                                                                                |
| 11. Mode of vaccine ascertainment of the second dose (to be verified by study staff) | <input type="checkbox"/> = vaccination card<br><input type="checkbox"/> = vaccination registry<br><input type="checkbox"/> = self-report<br><input type="checkbox"/> = other (specify _____)                                              |

|  |                                           |
|--|-------------------------------------------|
|  | <input type="checkbox"/> = not documented |
|--|-------------------------------------------|

Did you receive the influenza vaccine in the past winter (since September 2020)?

Yes

No

## B. Occupation and Work Responsibilities

B1. In what departments, wards, or parts of your health facility do you regularly work? Check all that apply.

- Hospital
- Emergency Department
- Critical Care or Intensive Care Unit
- Infectious Diseases
- Lung diseases
- Internal Medicine and/or Medical Specialties
- Pediatrics and/or Pediatric Specialties
- Surgery and/or Surgical Specialties
- Gynecology and/or Obstetrics
- Oncology and/or Hematology
- Dentistry
- Radiology
- Outpatient clinic
- Pharmacy
- Laboratory
- Nutrition
- Social Assistance
- Physiotherapy
- Occupational therapy
- Other*

B1a: \_Other department or ward, please SPECIFY: \_\_\_\_\_

B2. What is your current job/occupation at the hospital?

- Nurse
- Medical doctor
- Midwife

- Laboratory technician  
 Biologist  
 Pharmacist  
 Janitorial staff  
 Food worker  
 Social Worker  
 Radiology Technician  
 *Other*

B3. With which groups of patients do you have regular or daily face-to-face contact? Check all that apply.

- Infants aged <1 year  
 Children aged 1-12 years  
 Teenagers aged 13-19  
 Adults aged 20-64  
 Older adults aged 65 and older  
 Pregnant women

B4. Are you a clinical health worker (such as a doctor, nurse, or medical technician) who provides hands-on medical care to patients?

- Yes  
 No

B4a. [If B4= "Yes"] Do you perform any of the following procedures regularly (on most workdays)? This means you do this task yourself (and not simply oversee). Check any or all that apply.

- Collect a respiratory specimen using a swab  
 Collect a sputum specimen  
 Administer medication using a nebulizer  
 Apply nasal cannula (two pronged tube for nasal oxygen)  
 Apply oxygen face mask  
 Perform tracheal intubation  
 Insert a nasogastric (feeding) tube  
 Perform manual ventilation  
 Apply mechanical ventilation

- Perform suction of fluids or secretions
- Perform chest physiotherapy (such as chest percussion)
- Perform bedside bronchoscopy

**C. Health Status**

C1. How would you describe your current health overall?

- Excellent
- Very Good
- Good
- Fair
- Poor

**E. Questions about Illness, Vaccines, and Missing Work**

E1. How much do you know about the Covid-19 vaccine?

- Nothing at all
- A little
- Some
- A lot
- A great deal

E2. COVID-19 vaccination is safe.

- Strongly agree
- Mildly agree
- Neutral
- Mildly disagree
- Strongly disagree

E3. If you are unable to or don't get a COVID-19 vaccination, what do you think your chance of getting the COVID-19 will be?

- Almost Zero Chance
- Very Small Chance
- Small
- Moderate
- Large
- Very Large Chance



- 1  
2  
3  
4  
5  
6  
7  
8  
9  
10  
11  
12  
13  
14  
15  
16  
17  
18  
19  
20  
21  
22  
23  
24  
25  
26  
27  
28  
29  
30  
31  
32  
33  
34  
35  
36  
37  
38  
39  
40  
41  
42  
43  
44  
45  
46  
47  
48  
49  
50  
51  
52  
53  
54  
55  
56  
57  
58  
59  
60
- E4. How effective do you think the COVID-19 vaccine is in preventing you from getting sick with COVID-19?
- Extremely effective
  - Very effective
  - Somewhat effective
  - Not too effective
  - Not at all effective
- E5. If you get a COVID-19 vaccination, what do you think your chance of getting sick with COVID-19 will be this year...?
- Almost Zero Chance
  - Very Small Chance
  - Small Chance
  - Moderate Chance
  - Large Chance
  - Very Large Chance
- E6. If I get an COVID-19 vaccination, I will be less likely to miss work because of getting sick with COVID-19.
- Strongly agree
  - Mildly agree
  - Neutral
  - Mildly disagree
  - Strongly disagree
- E7. Compared to your co-workers at your health facility, how favorable or unfavorable is your attitude toward COVID-19 vaccination?
- Extremely more favorable
  - Much more favorable
  - Slightly more favorable
  - Average for co-workers at my facility
  - Slightly less favorable
  - Much less favorable
  - Extremely less favorable
- E8. If I don't get a COVID-19 vaccination, I will regret it.
- Strongly agree

- Mildly agree  
 Neutral  
 Mildly disagree  
 Strongly disagree

E9. How worried are you about getting sick with COVID-19 during the next 12 months?

- Extremely worried  
 Very worried  
 Moderately worried  
 A little worried  
 Not at all worried

E10. I get sick with influenza and other respiratory viruses more easily than other people my age.

- Strongly agree  
 Mildly agree  
 Neutral  
 Mildly disagree  
 Strongly disagree

E11. Employees at my healthcare facility are encouraged to go home if they have respiratory symptoms at work.

- Strongly agree  
 Mildly agree  
 Neutral  
 Mildly disagree  
 Strongly disagree

**F. Questions about life outside of work in the past 7 days**

|                                                                                                                                                                            |                                                                                                                                                                  |
|----------------------------------------------------------------------------------------------------------------------------------------------------------------------------|------------------------------------------------------------------------------------------------------------------------------------------------------------------|
| F1. Outside of the healthcare setting/your workplace, have you been in close contact with a confirmed COVID-19 patient or a person with COVID-19 symptoms?                 | <input type="checkbox"/> Yes<br><input type="checkbox"/> No<br><input type="checkbox"/> Unknown                                                                  |
| F2. How many times have you used public transportation besides a family car (public bus, train)?                                                                           | <input type="checkbox"/> 0<br><input type="checkbox"/> 1-2<br><input type="checkbox"/> 3-5<br><input type="checkbox"/> 5-8<br><input type="checkbox"/> 9 or more |
| F3. How many times have you attended a social indoor social event or gathering with MORE than 10 people? (This includes activities such as attending church/other house of | <input type="checkbox"/> 0<br><input type="checkbox"/> 1-2<br><input type="checkbox"/> 3-5                                                                       |

|                                                 |                                                                                                       |                                                                                                                                                                                                                                                      |
|-------------------------------------------------|-------------------------------------------------------------------------------------------------------|------------------------------------------------------------------------------------------------------------------------------------------------------------------------------------------------------------------------------------------------------|
| 1<br>2<br>3<br>4<br>5<br>6<br>7<br>8<br>9<br>10 | worship, parties, weddings, and sporting events, or visiting a bar or restaurant).                    | <input type="checkbox"/> 5-8<br><input type="checkbox"/> 9 or more                                                                                                                                                                                   |
| 11<br>12<br>13<br>14<br>15<br>16                | F4. How often have you worn a mask when in an indoor setting outside of your home?                    | <input type="checkbox"/> always<br><input type="checkbox"/> often<br><input type="checkbox"/> sometimes<br><input type="checkbox"/> rarely<br><input type="checkbox"/> never<br><input type="checkbox"/> did not go to indoor locations outside home |
| 17<br>18<br>19<br>20<br>21                      | F5. How often have you stayed at least 2 metres from other people in indoor spaces outside your home? | <input type="checkbox"/> always<br><input type="checkbox"/> often<br><input type="checkbox"/> sometimes<br><input type="checkbox"/> rarely<br><input type="checkbox"/> never<br><input type="checkbox"/> did not go to indoor locations outside home |
| 22<br>23<br>24<br>25<br>26<br>27                | F6. How many times have people who do not live in your household visited your home?                   | <input type="checkbox"/> always<br><input type="checkbox"/> often<br><input type="checkbox"/> sometimes<br><input type="checkbox"/> rarely<br><input type="checkbox"/> never                                                                         |
| 28<br>29<br>30<br>31<br>32<br>33                | F7. How many times have you visited other people in their homes?                                      | <input type="checkbox"/> always<br><input type="checkbox"/> often<br><input type="checkbox"/> sometimes<br><input type="checkbox"/> rarely<br><input type="checkbox"/> never<br><input type="checkbox"/> did not go to indoor locations outside home |

**Recent Symptoms:**

**In the past (7) days, have you experienced any of the following symptoms (check all that apply):**

- Fever
- Cough
- General Weakness
- Fatigue
- Headache
- Muscle aches
- Sore Throat
- Runny Nose
- Shortness of Breath
- Lack of Appetite
- Nausea
- Vomiting
- Diarrhea
- Altered Mental Status
- Loss of Taste
- Loss of Smell

1  
2  
3 If yes to any of symptoms:  
4

5  
6 Date of onset of first symptom: \_\_\_\_\_  
7

8 Did you see a doctor for your symptoms?  
9

10  Yes

11  No  
12

13  
14 Did you go to an emergency room?

15  Yes

16  No  
17

18  
19 Did you get hospitalized for your symptoms?

20  Yes

21  No  
22

23  
24 Did you get tested for SARS-CoV-2?

25  Yes

26  No  
27

28  
29 If yes, what test was done, check all that apply:

30  Rapid test (Nasal Swab)

31  PCR (Nasal Swab)

32  Blood test

33  Xray or CT scan  
34

35  
36  
37 What were the results?

38  Covid-19 Positive

39  Covid-19 Negative  
40  
41  
42  
43  
44  
45  
46  
47  
48  
49  
50  
51  
52  
53  
54  
55  
56  
57  
58  
59  
60

## Weekly symptom follow-up questionnaire

Have you received the COVID-19 vaccine?

- Yes I have received two does of COVID vaccine
- Yes I have received only one dose of COVID vaccine
- No I have not received any doses of COVID vaccines

In the past 7 days, or since you last filled out this questionnaire, have you received the COVID-19 Vaccine?

- Yes
- No

|                                                                      |                                                                                                                                                                                                                                           |
|----------------------------------------------------------------------|-------------------------------------------------------------------------------------------------------------------------------------------------------------------------------------------------------------------------------------------|
| 1. If yes, what was the date of the dose?<br>(dd/mm/yyyy)            | ___/___/___                                                                                                                                                                                                                               |
| 2. Which vaccine did you receive? (product name)                     | List options                                                                                                                                                                                                                              |
| 3. Mode of vaccine ascertainment (to be the verified by study staff) | <input type="checkbox"/> = vaccination card<br><input type="checkbox"/> = vaccination registry<br><input type="checkbox"/> = self-report<br><input type="checkbox"/> = other (specify _____)<br><input type="checkbox"/> = not documented |
| 4. What was the Batch of the vaccine received?                       | Please provide the match number from the above documents or state <input type="checkbox"/> Unknown                                                                                                                                        |

For women, when you received the vaccine, were you pregnant?

- Yes (if yes, specify trimester)
- No

**In the past (7) days, have you experienced any of the following symptoms (check all that apply):**

- Fever
- Cough
- General Weakness
- Fatigue
- Headache

- 1  
2  
3  Muscle aches  
4  Sore Throat  
5  Runny Nose  
6  Shortness of Breath  
7  Lack of Appetite  
8  Nausea  
9  Vomiting  
10  Diarrhea  
11  Altered Mental Status  
12  Loss of Taste  
13  Loss of Smell  
14  I have not experienced any of these symptoms in the past 7 days or since I last filled

15  
16  
17  
18  
19 out this questionnaire

20  
21  
22  
23 If yes to any of symptoms:

24  
25  
26 Date of onset of first symptom: \_\_\_\_\_

27  
28 Did you see a doctor for your symptoms?

- 29  Yes  
30  No  
31

32  
33 Did you go to an emergency room?

- 34  Yes  
35  No  
36

37  
38 Did you get hospitalized for your symptoms?

- 39  Yes  
40  No  
41

42  
43 Did you get tested for SARS-CoV-2?

- 44  Yes  
45  No  
46

47  
48 If yes, what test was done, check all that apply:

- 49  Rapid test  
50  PCR Nasal Swab  
51  Blood test  
52  Xray or CT scan  
53  
54  
55  
56  
57  
58  
59  
60

What were the results?

Covid-19 Positive

Covid-19 Negative

### **Questions about life outside of work in the past 7 days**

|                                                                                                                                                                                                                                                               |                                                                                                                                                                                                                                                      |
|---------------------------------------------------------------------------------------------------------------------------------------------------------------------------------------------------------------------------------------------------------------|------------------------------------------------------------------------------------------------------------------------------------------------------------------------------------------------------------------------------------------------------|
| F1. Outside of the healthcare setting/your workplace, have you been in close contact with a confirmed COVID-19 patient or a person with COVID-19 symptoms?                                                                                                    | <input type="checkbox"/> Yes<br><input type="checkbox"/> No<br><input type="checkbox"/> Unknown                                                                                                                                                      |
| F2. How many times have you used public transportation besides a family car (public bus, train)?                                                                                                                                                              | <input type="checkbox"/> 0<br><input type="checkbox"/> 1-2<br><input type="checkbox"/> 3-5<br><input type="checkbox"/> 5-8<br><input type="checkbox"/> 9 or more                                                                                     |
| F3. How many times have you attended a social indoor social event or gathering with MORE than 10 people? (This includes activities such as attending church/other house of worship, parties, weddings, and sporting events, or visiting a bar or restaurant). | <input type="checkbox"/> 0<br><input type="checkbox"/> 1-2<br><input type="checkbox"/> 3-5<br><input type="checkbox"/> 5-8<br><input type="checkbox"/> 9 or more                                                                                     |
| F4. How often have you worn a mask when in an indoor setting outside of your home?                                                                                                                                                                            | <input type="checkbox"/> always<br><input type="checkbox"/> often<br><input type="checkbox"/> sometimes<br><input type="checkbox"/> rarely<br><input type="checkbox"/> never<br><input type="checkbox"/> did not go to indoor locations outside home |
| F5. How often have you stayed at least 2 metres from other people in indoor spaces outside your home?                                                                                                                                                         | <input type="checkbox"/> always<br><input type="checkbox"/> often<br><input type="checkbox"/> sometimes<br><input type="checkbox"/> rarely<br><input type="checkbox"/> never<br><input type="checkbox"/> did not go to indoor locations outside home |
| F6. How many times have people who do not live in your household visited your home?                                                                                                                                                                           | <input type="checkbox"/> always<br><input type="checkbox"/> often<br><input type="checkbox"/> sometimes<br><input type="checkbox"/> rarely<br><input type="checkbox"/> never                                                                         |
| F7. How many times have you visited other people in their homes?                                                                                                                                                                                              | <input type="checkbox"/> always<br><input type="checkbox"/> often<br><input type="checkbox"/> sometimes<br><input type="checkbox"/> rarely<br><input type="checkbox"/> never<br><input type="checkbox"/> did not go to indoor locations outside home |

## Questionnaire for following up ad hoc symptomatic participants

**In last 7 days, have you had any of the following symptoms (check all that apply):**

- Fever
- Cough
- General Weakness
- Fatigue
- Headache
- Muscle Aches
- Sore Throat
- Runny Nose
- Shortness of Breath
- Lack of Appetite
- Nausea
- Vomiting
- Diarrhea
- Altered Mental Status
- Loss of Taste
- Loss of Smell
- Other

If yes to any of symptoms:

Date of onset of first symptom: \_\_\_\_\_

If the participant has had symptoms in the past 7 days that meet the case definition (see below), a respiratory specimen should be collected and the participant should be instructed to quarantine until test results are available, in according with Albania Ministry of Health and Social Protection guidelines.

A participant should be considered a suspected case of COVID-19 for this study if the following criteria are met

- Acute (in the previous 7 days) onset of fever or cough OR
- acute onset of one or more of the following symptoms in the previous 7 days: General weakness/fatigue, headache, myalgia, sore throat, coryza, dyspnoea, anorexia/nausea/vomiting, diarrhoea, altered mental status, anosmia, ageusia.



1  
2  
3  
4  
5  
6  
7  
8  
9  
10  
11  
12  
13  
14  
15  
16  
17  
18  
19  
20  
21  
22  
23  
24  
25  
26  
27  
28  
29  
30  
31  
32  
33  
34  
35  
36  
37  
38  
39  
40  
41  
42  
43  
44  
45  
46  
47  
48  
49  
50  
51  
52  
53  
54  
55  
56  
57  
58  
59  
60

For peer review only

1  
2  
3  
4 Questionnaire for following up positive COVID-19 cases 30 days after  
5 positive test  
6  
7

8 **Since the day of your positive test (xxx Date), how many days were you sick for?**  
9

- 10  \_\_\_ days  
11  
12  I am still feeling ill  
13

14  
15 If you are still feeling ill, which of the following symptoms do you have?  
16

- 17  Fever  
18  Cough  
19  General Weakness  
20  Fatigue  
21  Headache  
22  Muscle Aches  
23  Sore Throat  
24  Runny Nose  
25  Shortness of Breath  
26  Lack of Appetite  
27  Nausea  
28  Vomiting  
29  Diarrhea  
30  Altered Mental Status  
31  Loss of Taste  
32  Loss of Smell  
33  Other  
34  
35  
36  
37  
38  
39  
40

41 During the course of your COVID-19 illness, did you see a doctor for your symptoms?  
42

- 43  Yes  
44  No  
45

46 During the course of your COVID-19 illness, did you go to an emergency room?  
47

- 48  Yes  
49  No  
50

51 Did you get hospitalized for your COVID-19 illness?  
52

- 53  Yes  
54  No  
55

56  
57 If yes, how many days were you hospitalized for:  
58

- 59  \_\_ XX days  
60  Still hospitalized

1  
2  
3  
4  
5  
6 Did you receive oxygen for your symptoms?

7  Yes

8  No  
9

10  
11 Did you require ICU care?

12  Yes

13  No  
14  
15

16 Did you require intubation?

17  Yes

18  No  
19  
20  
21

22 For participants who were hospitalized during the course of their illness, staff should record if at  
23 the 30-day questionnaire the participant was

24  Still in hospital

25  Discharged from hospital

26  Deceased  
27  
28  
29  
30  
31  
32  
33  
34  
35  
36  
37  
38  
39  
40  
41  
42  
43  
44  
45  
46  
47  
48  
49  
50  
51  
52  
53  
54  
55  
56  
57  
58  
59  
60

STROBE Statement—Checklist of items that should be included in reports of *cohort studies*

|                           | Item No | Recommendation                                                                                                                                                                                                                                                                                                         | Page No |
|---------------------------|---------|------------------------------------------------------------------------------------------------------------------------------------------------------------------------------------------------------------------------------------------------------------------------------------------------------------------------|---------|
| <b>Title and abstract</b> | 1       | (a) Indicate the study's design with a commonly used term in the title or the abstract<br>(b) Provide in the abstract an informative and balanced summary of what was done and what was found                                                                                                                          | 1       |
| <b>Introduction</b>       |         |                                                                                                                                                                                                                                                                                                                        |         |
| Background/rationale      | 2       | Explain the scientific background and rationale for the investigation being reported                                                                                                                                                                                                                                   | 3-4     |
| Objectives                | 3       | State specific objectives, including any prespecified hypotheses                                                                                                                                                                                                                                                       | 4       |
| <b>Methods</b>            |         |                                                                                                                                                                                                                                                                                                                        |         |
| Study design              | 4       | Present key elements of study design early in the paper                                                                                                                                                                                                                                                                | 6       |
| Setting                   | 5       | Describe the setting, locations, and relevant dates, including periods of recruitment, exposure, follow-up, and data collection                                                                                                                                                                                        | 5       |
| Participants              | 6       | (a) Give the eligibility criteria, and the sources and methods of selection of participants. Describe methods of follow-up<br>(b) For matched studies, give matching criteria and number of exposed and unexposed                                                                                                      | 5       |
| Variables                 | 7       | Clearly define all outcomes, exposures, predictors, potential confounders, and effect modifiers. Give diagnostic criteria, if applicable                                                                                                                                                                               | 10-12   |
| Data sources/measurement  | 8*      | For each variable of interest, give sources of data and details of methods of assessment (measurement). Describe comparability of assessment methods if there is more than one group                                                                                                                                   | 6-8     |
| Bias                      | 9       | Describe any efforts to address potential sources of bias                                                                                                                                                                                                                                                              | 5, 15   |
| Study size                | 10      | Explain how the study size was arrived at                                                                                                                                                                                                                                                                              | 8       |
| Quantitative variables    | 11      | Explain how quantitative variables were handled in the analyses. If applicable, describe which groupings were chosen and why                                                                                                                                                                                           | 10      |
| Statistical methods       | 12      | (a) Describe all statistical methods, including those used to control for confounding<br>(b) Describe any methods used to examine subgroups and interactions<br>(c) Explain how missing data were addressed<br>(d) If applicable, explain how loss to follow-up was addressed<br>(e) Describe any sensitivity analyses | 10      |
| <b>Results</b>            |         |                                                                                                                                                                                                                                                                                                                        |         |
| Participants              | 13*     | (a) Report numbers of individuals at each stage of study—eg numbers potentially eligible, examined for eligibility, confirmed eligible, included in the study, completing follow-up, and analysed<br>(b) Give reasons for non-participation at each stage<br>(c) Consider use of a flow diagram                        | 5, 12   |
| Descriptive data          | 14*     | (a) Give characteristics of study participants (eg demographic, clinical, social) and information on exposures and potential confounders<br>(b) Indicate number of participants with missing data for each variable of interest<br>(c) Summarise follow-up time (eg, average and total amount)                         | 12      |
| Outcome data              | 15*     | Report numbers of outcome events or summary measures over time                                                                                                                                                                                                                                                         | n/a     |

|    |                          |    |                                                                                                                                                                                                              |       |
|----|--------------------------|----|--------------------------------------------------------------------------------------------------------------------------------------------------------------------------------------------------------------|-------|
| 1  | Main results             | 16 | (a) Give unadjusted estimates and, if applicable, confounder-adjusted estimates and their precision (eg, 95% confidence interval). Make clear which confounders were adjusted for and why they were included | n/a   |
| 2  |                          |    | (b) Report category boundaries when continuous variables were categorized                                                                                                                                    |       |
| 3  |                          |    | (c) If relevant, consider translating estimates of relative risk into absolute risk for a meaningful time period                                                                                             |       |
| 4  | Other analyses           | 17 | Report other analyses done—eg analyses of subgroups and interactions, and sensitivity analyses                                                                                                               | n/a   |
| 5  | <b>Discussion</b>        |    |                                                                                                                                                                                                              |       |
| 6  | Key results              | 18 | Summarise key results with reference to study objectives                                                                                                                                                     | 13-14 |
| 7  | Limitations              | 19 | Discuss limitations of the study, taking into account sources of potential bias or imprecision. Discuss both direction and magnitude of any potential bias                                                   | 15    |
| 8  | Interpretation           | 20 | Give a cautious overall interpretation of results considering objectives, limitations, multiplicity of analyses, results from similar studies, and other relevant evidence                                   | 13-14 |
| 9  | Generalisability         | 21 | Discuss the generalisability (external validity) of the study results                                                                                                                                        | 15    |
| 10 | <b>Other information</b> |    |                                                                                                                                                                                                              |       |
| 11 | Funding                  | 22 | Give the source of funding and the role of the funders for the present study and, if applicable, for the original study on which the present article is based                                                | 16    |

\*Give information separately for exposed and unexposed groups.

**Note:** An Explanation and Elaboration article discusses each checklist item and gives methodological background and published examples of transparent reporting. The STROBE checklist is best used in conjunction with this article (freely available on the Web sites of PLoS Medicine at <http://www.plosmedicine.org/>, Annals of Internal Medicine at <http://www.annals.org/>, and Epidemiology at <http://www.epidem.com/>). Information on the STROBE Initiative is available at <http://www.strobe-statement.org>.
