# Supplementary material for: COVID-19 vaccine effectiveness among healthcare workers in Albania (COVE-AL): protocol for a prospective cohort study and cohort baseline data
Source: PubMed Central journal article supplement — BMJ Open. 2022 Mar 23;12(3):e057741. doi: 10.1136/bmjopen-2021-057741 (PMC8943479; doi:10.1136/bmjopen-2021-057741), 2022-03-23
Supplement: bmjopen-2021-057741supp001.pdf [file bmjopen-2021-057741supp001.pdf]

## Enrollment Questionnaire

### **INSTRUCTIONS:**

This survey will take about 5-10 minutes to complete. If you have any questions, please contact [XXXXXX] at [-XXXXXXXXXX] or email XXXXXXX.

Thank you again for your time.

### **A. Demographics, SARS-CoV-2 history and vaccination history**

A1. What is your age?

A2. Are you male or female?

A2a. If you are female:

Are you pregnant?: (If yes, specify trimester)

Are you Breastfeeding?:

A3. What is your height in cm?

A4. What is your weight in kg?

A5. Have you ever been diagnosed with any of the following?

- Cancer
- Chronic Heart Disease, excluding high blood pressure
- High blood pressure/Hypertension
- Chronic Kidney Disease
- Chronic Liver Disease (such as cirrhosis, hepatitis, fatty liver disease)
- Chronic Lung Disease (such as asthma, COPD, bronchitis, etc...)
- Diabetes
- Immunocompromised, including solid organ transplant and HIV
- Neurological Disease, including cerebrovascular disease, epilepsy, multiple sclerosis, etc...
- Obesity
- Autoimmune disorder

A6. Do you currently smoke?

- Yes
- No

A6a: *If no, have you smoked previously?*

- Yes  
 No

A7. How many people (not including yourself) do you live with?

- 0  
 1  
 2  
 3  
 4  
 5  
 6 or more

A8. Since January 2020, have you ever received a positive laboratory test for SARS-CoV-2, the virus that causes COVID-19?

- Yes  
 No

A8a. If yes, when was the positive test (date), and what kind of test was performed (PCR or rapid test or serology)

- PCR (nasal swab)  
 Rapid Test (nasal swab)  
 Serology Test (a blood test)  
 Don't remember

Date of Test \_\_\_\_\_

(Allow option for multiple positive test results)

### **COVID 19 Vaccination Questions**

A9. When the COVID -19 vaccine becomes available, what are the chances that you will choose to receive a COVID-19 vaccination if you are offered one?

- Almost Zero Chance  
 Very Small Chance  
 Small  
 Moderate  
 Large  
 Very Large Chance

Almost Certain

I have already received a COVID-19 vaccine: Date: \_\_\_\_\_

| <b>Vaccination history</b>                                                           |                                                                                                                                                                                                                                           |
|--------------------------------------------------------------------------------------|-------------------------------------------------------------------------------------------------------------------------------------------------------------------------------------------------------------------------------------------|
| <b>COVID vaccine</b>                                                                 |                                                                                                                                                                                                                                           |
| 1. Do you have a contraindication for the COVID-19 vaccine?                          | <input type="checkbox"/> Yes <input type="checkbox"/> No <input type="checkbox"/> Unknown                                                                                                                                                 |
| 2. Have you received the first dose of any COVID-19 vaccine?                         | <input type="checkbox"/> Yes <input type="checkbox"/> No <input type="checkbox"/> Unknown                                                                                                                                                 |
| 3. If yes, what was the date of the first dose? (dd/mm/yyyy)                         | ___/___/___                                                                                                                                                                                                                               |
| 4. Which vaccine did you receive? (product name)                                     |                                                                                                                                                                                                                                           |
| 5. Mode of vaccine ascertainment (to be the verified by study staff)                 | <input type="checkbox"/> = vaccination card<br><input type="checkbox"/> = vaccination registry<br><input type="checkbox"/> = self-report<br><input type="checkbox"/> = other (specify _____)<br><input type="checkbox"/> = not documented |
| 6. What was the Batch of the vaccine received?                                       | Please provide the match number from the above documents or state <input type="checkbox"/> Unknown                                                                                                                                        |
| 7. Have you received a second dose of the COVID-19 vaccine?                          | <input type="checkbox"/> Yes <input type="checkbox"/> No <input type="checkbox"/> Unknown                                                                                                                                                 |
| 8. If yes, what day did you receive the second dose (dd/mm/yyyy)                     | ___/___/___                                                                                                                                                                                                                               |
| 9. Which kind of vaccine did you receive for the second dose (product name)          |                                                                                                                                                                                                                                           |
| 10. What was the Batch number of the second dose vaccine you received?               | Please provide the match number from the ascertainment documents or state <input type="checkbox"/> Unknown                                                                                                                                |
| 11. Mode of vaccine ascertainment of the second dose (to be verified by study staff) | <input type="checkbox"/> = vaccination card<br><input type="checkbox"/> = vaccination registry<br><input type="checkbox"/> = self-report<br><input type="checkbox"/> = other (specify _____)                                              |

|  |                                           |
|--|-------------------------------------------|
|  | <input type="checkbox"/> = not documented |
|--|-------------------------------------------|

Did you receive the influenza vaccine in the past winter (since September 2020)?

- Yes  
 No

**B. Occupation and Work Responsibilities**

B1. In what departments, wards, or parts of your health facility do you regularly work? Check all that apply.

- Hospital  
 Emergency Department  
 Critical Care or Intensive Care Unit  
 Infectious Diseases  
 Lung diseases  
 Internal Medicine and/or Medical Specialties  
 Pediatrics and/or Pediatric Specialties  
 Surgery and/or Surgical Specialties  
 Gynecology and/or Obstetrics  
 Oncology and/or Hematology  
 Dentistry  
 Radiology  
 Outpatient clinic  
 Pharmacy  
 Laboratory  
 Nutrition  
 Social Assistance  
 Physiotherapy  
 Occupational therapy  
 *Other*

B1a: Other department or ward, please SPECIFY: \_\_\_\_\_

B2. What is your current job/occupation at the hospital?

- Nurse  
 Medical doctor  
 Midwife

- Laboratory technician
- Biologist
- Pharmacist
- Janitorial staff
- Food worker
- Social Worker
- Radiology Technician
- Other*

B3. With which groups of patients do you have regular or daily face-to-face contact? Check all that apply.

- Infants aged <1 year
- Children aged 1-12 years
- Teenagers aged 13-19
- Adults aged 20-64
- Older adults aged 65 and older
- Pregnant women

B4. Are you a clinical health worker (such as a doctor, nurse, or medical technician) who provides hands-on medical care to patients?

- Yes
- No

B4a. [If B4= “Yes”] Do you perform any of the following procedures regularly (on most workdays)? This means you do this task yourself (and not simply oversee). Check any or all that apply.

- Collect a respiratory specimen using a swab
- Collect a sputum specimen
- Administer medication using a nebulizer
- Apply nasal cannula (two pronged tube for nasal oxygen)
- Apply oxygen face mask
- Perform tracheal intubation
- Insert a nasogastric (feeding) tube
- Perform manual ventilation
- Apply mechanical ventilation

- Perform suction of fluids or secretions
- Perform chest physiotherapy (such as chest percussion)
- Perform bedside bronchoscopy

**C. Health Status**

C1. How would you describe your current health overall?

- Excellent
- Very Good
- Good
- Fair
- Poor

**E. Questions about Illness, Vaccines, and Missing Work**

E1. How much do you know about the Covid-19 vaccine?

- Nothing at all
- A little
- Some
- A lot
- A great deal

E2. COVID-19 vaccination is safe.

- Strongly agree
- Mildly agree
- Neutral
- Mildly disagree
- Strongly disagree

E3. If you are unable to or don't get a COVID-19 vaccination, what do you think your chance of getting the COVID-19 will be?

- Almost Zero Chance
- Very Small Chance
- Small
- Moderate
- Large
- Very Large Chance

- E4. How effective do you think the COVID-19 vaccine is in preventing you from getting sick with COVID-19?
- Extremely effective
  - Very effective
  - Somewhat effective
  - Not too effective
  - Not at all effective
- E5. If you get a COVID-19 vaccination, what do you think your chance of getting sick with COVID-19 will be this year...?
- Almost Zero Chance
  - Very Small Chance
  - Small Chance
  - Moderate Chance
  - Large Chance
  - Very Large Chance
- E6. If I get an COVID-19 vaccination, I will be less likely to miss work because of getting sick with COVID-19.
- Strongly agree
  - Mildly agree
  - Neutral
  - Mildly disagree
  - Strongly disagree
- E7. Compared to your co-workers at your health facility, how favorable or unfavorable is your attitude toward COVID-19 vaccination?
- Extremely more favorable
  - Much more favorable
  - Slightly more favorable
  - Average for co-workers at my facility
  - Slightly less favorable
  - Much less favorable
  - Extremely less favorable
- E8. If I don't get a COVID-19 vaccination, I will regret it.
- Strongly agree

- Mildly agree  
 Neutral  
 Mildly disagree  
 Strongly disagree

E9. How worried are you about getting sick with COVID-19 during the next 12 months?

- Extremely worried  
 Very worried  
 Moderately worried  
 A little worried  
 Not at all worried

E10. I get sick with influenza and other respiratory viruses more easily than other people my age.

- Strongly agree  
 Mildly agree  
 Neutral  
 Mildly disagree  
 Strongly disagree

E11. Employees at my healthcare facility are encouraged to go home if they have respiratory symptoms at work.

- Strongly agree  
 Mildly agree  
 Neutral  
 Mildly disagree  
 Strongly disagree

**F. Questions about life outside of work in the past 7 days**

|                                                                                                                                                                            |                                                                                                                                                                  |
|----------------------------------------------------------------------------------------------------------------------------------------------------------------------------|------------------------------------------------------------------------------------------------------------------------------------------------------------------|
| F1. Outside of the healthcare setting/your workplace, have you been in close contact with a confirmed COVID-19 patient or a person with COVID-19 symptoms?                 | <input type="checkbox"/> Yes<br><input type="checkbox"/> No<br><input type="checkbox"/> Unknown                                                                  |
| F2. How many times have you used public transportation besides a family car (public bus, train)?                                                                           | <input type="checkbox"/> 0<br><input type="checkbox"/> 1-2<br><input type="checkbox"/> 3-5<br><input type="checkbox"/> 5-8<br><input type="checkbox"/> 9 or more |
| F3. How many times have you attended a social indoor social event or gathering with MORE than 10 people? (This includes activities such as attending church/other house of | <input type="checkbox"/> 0<br><input type="checkbox"/> 1-2<br><input type="checkbox"/> 3-5                                                                       |



|                                                                                                       |                                                                                                                                                                                                                                                      |
|-------------------------------------------------------------------------------------------------------|------------------------------------------------------------------------------------------------------------------------------------------------------------------------------------------------------------------------------------------------------|
| worship, parties, weddings, and sporting events, or visiting a bar or restaurant).                    | <input type="checkbox"/> 5-8<br><input type="checkbox"/> 9 or more                                                                                                                                                                                   |
| F4. How often have you worn a mask when in an indoor setting outside of your home?                    | <input type="checkbox"/> always<br><input type="checkbox"/> often<br><input type="checkbox"/> sometimes<br><input type="checkbox"/> rarely<br><input type="checkbox"/> never<br><input type="checkbox"/> did not go to indoor locations outside home |
| F5. How often have you stayed at least 2 metres from other people in indoor spaces outside your home? | <input type="checkbox"/> always<br><input type="checkbox"/> often<br><input type="checkbox"/> sometimes<br><input type="checkbox"/> rarely<br><input type="checkbox"/> never<br><input type="checkbox"/> did not go to indoor locations outside home |
| F6. How many times have people who do not live in your household visited your home?                   | <input type="checkbox"/> always<br><input type="checkbox"/> often<br><input type="checkbox"/> sometimes<br><input type="checkbox"/> rarely<br><input type="checkbox"/> never                                                                         |
| F7. How many times have you visited other people in their homes?                                      | <input type="checkbox"/> always<br><input type="checkbox"/> often<br><input type="checkbox"/> sometimes<br><input type="checkbox"/> rarely<br><input type="checkbox"/> never<br><input type="checkbox"/> did not go to indoor locations outside home |

**Recent Symptoms:**

**In the past (7) days, have you experienced any of the following symptoms (check all that apply):**

- Fever
- Cough
- General Weakness
- Fatigue
- Headache
- Muscle aches
- Sore Throat
- Runny Nose
- Shortness of Breath
- Lack of Appetite
- Nausea
- Vomiting
- Diarrhea
- Altered Mental Status
- Loss of Taste
- Loss of Smell

If yes to any of symptoms:

Date of onset of first symptom: \_\_\_\_\_

Did you see a doctor for your symptoms?

- Yes  
 No

Did you go to an emergency room?

- Yes  
 No

Did you get hospitalized for your symptoms?

- Yes  
 No

Did you get tested for SARS-CoV-2?

- Yes  
 No

If yes, what test was done, check all that apply:

- Rapid test (Nasal Swab)  
 PCR (Nasal Swab)  
 Blood test  
 Xray or CT scan

What were the results?

- Covid-19 Positive  
 Covid-19 Negative
