# Supplementary material for: COVID-19 vaccine effectiveness among healthcare workers in Albania (COVE-AL): protocol for a prospective cohort study and cohort baseline data
Source: PubMed Central journal article supplement — BMJ Open. 2022 Mar 23;12(3):e057741. doi: 10.1136/bmjopen-2021-057741 (PMC8943479; doi:10.1136/bmjopen-2021-057741), 2022-03-23
Supplement: bmjopen-2021-057741supp002.pdf [file bmjopen-2021-057741supp002.pdf]

## Weekly symptom follow-up questionnaire

Have you received the COVID-19 vaccine?

- Yes I have received two does of COVID vaccine  
 Yes I have received only one dose of COVID vaccine  
 No I have not received any doses of COVID vaccines

In the past 7 days, or since you last filled out this questionnaire, have you received the COVID-19 Vaccine?

- Yes  
 No

|                                                                      |                                                                                                                                                                                                                                           |
|----------------------------------------------------------------------|-------------------------------------------------------------------------------------------------------------------------------------------------------------------------------------------------------------------------------------------|
| 1. If yes, what was the date of the dose?<br>(dd/mm/yyyy)            | ___/___/___                                                                                                                                                                                                                               |
| 2. Which vaccine did you receive? (product name)                     | List options                                                                                                                                                                                                                              |
| 3. Mode of vaccine ascertainment (to be the verified by study staff) | <input type="checkbox"/> = vaccination card<br><input type="checkbox"/> = vaccination registry<br><input type="checkbox"/> = self-report<br><input type="checkbox"/> = other (specify _____)<br><input type="checkbox"/> = not documented |
| 4. What was the Batch of the vaccine received?                       | Please provide the match number from the above documents or state <input type="checkbox"/> Unknown                                                                                                                                        |

For women, when you received the vaccine, were you pregnant?

- Yes (if yes, specify trimester)  
 No

**In the past (7) days, have you experienced any of the following symptoms (check all that apply):**

- Fever  
 Cough  
 General Weakness  
 Fatigue  
 Headache

- Muscle aches
- Sore Throat
- Runny Nose
- Shortness of Breath
- Lack of Appetite
- Nausea
- Vomiting
- Diarrhea
- Altered Mental Status
- Loss of Taste
- Loss of Smell
- I have not experienced any of these symptoms in the past 7 days or since I last filled

out this questionnaire

If yes to any of symptoms:

Date of onset of first symptom: \_\_\_\_\_

Did you see a doctor for your symptoms?

- Yes
- No

Did you go to an emergency room?

- Yes
- No

Did you get hospitalized for your symptoms?

- Yes
- No

Did you get tested for SARS-CoV-2?

- Yes
- No

If yes, what test was done, check all that apply:

- Rapid test
- PCR Nasal Swab
- Blood test
- Xray or CT scan

What were the results?

- Covid-19 Positive  
 Covid-19 Negative

**Questions about life outside of work in the past 7 days**

|                                                                                                                                                                                                                                                               |                                                                                                                                                                                                                                                      |
|---------------------------------------------------------------------------------------------------------------------------------------------------------------------------------------------------------------------------------------------------------------|------------------------------------------------------------------------------------------------------------------------------------------------------------------------------------------------------------------------------------------------------|
| F1. Outside of the healthcare setting/your workplace, have you been in close contact with a confirmed COVID-19 patient or a person with COVID-19 symptoms?                                                                                                    | <input type="checkbox"/> Yes<br><input type="checkbox"/> No<br><input type="checkbox"/> Unknown                                                                                                                                                      |
| F2. How many times have you used public transportation besides a family car (public bus, train)?                                                                                                                                                              | <input type="checkbox"/> 0<br><input type="checkbox"/> 1-2<br><input type="checkbox"/> 3-5<br><input type="checkbox"/> 5-8<br><input type="checkbox"/> 9 or more                                                                                     |
| F3. How many times have you attended a social indoor social event or gathering with MORE than 10 people? (This includes activities such as attending church/other house of worship, parties, weddings, and sporting events, or visiting a bar or restaurant). | <input type="checkbox"/> 0<br><input type="checkbox"/> 1-2<br><input type="checkbox"/> 3-5<br><input type="checkbox"/> 5-8<br><input type="checkbox"/> 9 or more                                                                                     |
| F4. How often have you worn a mask when in an indoor setting outside of your home?                                                                                                                                                                            | <input type="checkbox"/> always<br><input type="checkbox"/> often<br><input type="checkbox"/> sometimes<br><input type="checkbox"/> rarely<br><input type="checkbox"/> never<br><input type="checkbox"/> did not go to indoor locations outside home |
| F5. How often have you stayed at least 2 metres from other people in indoor spaces outside your home?                                                                                                                                                         | <input type="checkbox"/> always<br><input type="checkbox"/> often<br><input type="checkbox"/> sometimes<br><input type="checkbox"/> rarely<br><input type="checkbox"/> never<br><input type="checkbox"/> did not go to indoor locations outside home |
| F6. How many times have people who do not live in your household visited your home?                                                                                                                                                                           | <input type="checkbox"/> always<br><input type="checkbox"/> often<br><input type="checkbox"/> sometimes<br><input type="checkbox"/> rarely<br><input type="checkbox"/> never                                                                         |
| F7. How many times have you visited other people in their homes?                                                                                                                                                                                              | <input type="checkbox"/> always<br><input type="checkbox"/> often<br><input type="checkbox"/> sometimes<br><input type="checkbox"/> rarely<br><input type="checkbox"/> never<br><input type="checkbox"/> did not go to indoor locations outside home |
