# Supplementary material for: COVID-19 vaccine effectiveness among healthcare workers in Albania (COVE-AL): protocol for a prospective cohort study and cohort baseline data
Source: PubMed Central journal article supplement — BMJ Open. 2022 Mar 23;12(3):e057741. doi: 10.1136/bmjopen-2021-057741 (PMC8943479; doi:10.1136/bmjopen-2021-057741), 2022-03-23
Supplement: bmjopen-2021-057741supp003.pdf [file bmjopen-2021-057741supp003.pdf]

## Questionnaire for following up ad hoc symptomatic participants

**In last 7 days, have you had any of the following symptoms (check all that apply):**

- Fever
- Cough
- General Weakness
- Fatigue
- Headache
- Muscle Aches
- Sore Throat
- Runny Nose
- Shortness of Breath
- Lack of Appetite
- Nausea
- Vomiting
- Diarrhea
- Altered Mental Status
- Loss of Taste
- Loss of Smell
- Other

If yes to any of symptoms:

Date of onset of first symptom: \_\_\_\_\_

If the participant has had symptoms in the past 7 days that meet the case definition (see below), a respiratory specimen should be collected and the participant should be instructed to quarantine until test results are available, in according with Albania Ministry of Health and Social Protection guidelines.

A participant should be considered a suspected case of COVID-19 for this study if the following criteria are met

- Acute (in the previous 7 days) onset of fever or cough OR
- acute onset of one or more of the following symptoms in the previous 7 days: General weakness/fatigue, headache, myalgia, sore throat, coryza, dyspnoea, anorexia/nausea/vomiting, diarrhoea, altered mental status, anosmia, ageusia.
