# Supplementary material for: COVID-19 vaccine effectiveness among healthcare workers in Albania (COVE-AL): protocol for a prospective cohort study and cohort baseline data
Source: PubMed Central journal article supplement — BMJ Open. 2022 Mar 23;12(3):e057741. doi: 10.1136/bmjopen-2021-057741 (PMC8943479; doi:10.1136/bmjopen-2021-057741), 2022-03-23
Supplement: bmjopen-2021-057741supp004.pdf [file bmjopen-2021-057741supp004.pdf]

## Questionnaire for following up positive COVID-19 cases 30 days after positive test

**Since the day of your positive test (xxx Date), how many days were you sick for?**

- \_\_\_ days
- I am still feeling ill

If you are still feeling ill, which of the following symptoms do you have?

- Fever
- Cough
- General Weakness
- Fatigue
- Headache
- Muscle Aches
- Sore Throat
- Runny Nose
- Shortness of Breath
- Lack of Appetite
- Nausea
- Vomiting
- Diarrhea
- Altered Mental Status
- Loss of Taste
- Loss of Smell
- Other

During the course of your COVID-19 illness, did you see a doctor for your symptoms?

- Yes
- No

During the course of your COVID-19 illness, did you go to an emergency room?

- Yes
- No

Did you get hospitalized for your COVID-19 illness?

- Yes
- No

If yes, how many days were you hospitalized for:

- \_\_ XX days
- Still hospitalized

Did you receive oxygen for your symptoms?

- Yes  
 No

Did you require ICU care?

- Yes  
 No

Did you require intubation?

- Yes  
 No

For participants who were hospitalized during the course of their illness, staff should record if at the 30-day questionnaire the participant was

- Still in hospital  
 Discharged from hospital  
 Deceased
